# Supplementary material for: Nanomagnetic CoFe2O4@SiO2-EA-H3PO4 as a zwitterionic catalyst for the synthesis of bioactive pyrazolopyranopyrimidines and dihydropyrano[2,3-c]pyrazoles
Source: Royal Society of Chemistry journal article supplement (doi:10.1039/d3na00900a), 2024-01-01
Supplement: d3na00900a1.pdf [file d3na00900a1.pdf]

**Nanomagnetic CoFe<sub>2</sub>O<sub>4</sub>@SiO<sub>2</sub>-EA-H<sub>3</sub>PO<sub>4</sub> as an efficient and reusable catalyst for synthesis  
of pyrazolopyranopyrimidines and dihydropyrano[2,3-c]pyrazoles and Investigation of  
Their Antibacterial activity**

Ali Mirzaie <sup>a</sup>, Lotfi Shiri <sup>a\*</sup>, Mosstafa Kazemi <sup>a</sup>, Nourkhoda Sadeghifard <sup>b</sup>, Vahab Hassan Kaviar <sup>b</sup>

<sup>a</sup>Department of Chemistry, Faculty of Basic Sciences, Ilam University, P.O. Box 69315-516, Ilam, Iran.

<sup>b</sup>Clinical Microbiology Research Center, Ilam University of Medical Sciences, Ilam, Iran,

\*correspondence to: Lotfi Shiri

Email: [l.shiri@ilam.ac.ir](mailto:l.shiri@ilam.ac.ir)

**SPECTROSCOPIC DATA OF SELECTED COMPOUNDS**

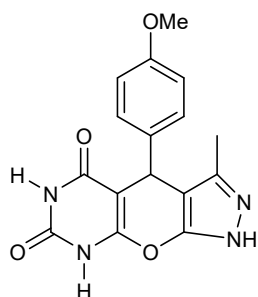

**4-(4-methoxyphenyl)-3-methyl-4,8-dihydropyrazolo[4',3':5,6]pyrano[2,3-d]pyrimidine-5,7(1H,6H)-dione**

IR (KBr)  $\nu$  = 3430, 2880, 2827, 1702, 1464, 1359, 1040; <sup>1</sup>H NMR (DMSO-d<sub>6</sub>, 250 MHz): 11.03 (s, 1H), 10.22 – 9.95 (m, 2H), 6.92 (d, 2H), 6.75 (d, 2H), 5.34 (s, 1H), 3.65 (s, 3H), 2.17 (s, 3H). <sup>13</sup>C NMR (DMSO-d<sub>6</sub>, 62.5 MHz): 166.00, 161.03, 157.55, 151.10, 143.76, 134.84, 132.27, 128.11, 128.10, 113.65, 106.53, 55.36, 10.45.

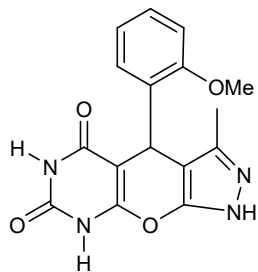

**4-(2-methoxyphenyl)-3-methyl-4,8-dihydropyrazolo[4',3':5,6]pyrano[2,3-d]pyrimidine-5,7(1H,6H)-dione**

IR (KBr)  $\nu$  = 3453, 2894, 2831, 1698, 1484, 1388, 1040; <sup>1</sup>H NMR (DMSO-d<sub>6</sub>, 250 MHz): 11.10 (s, 1H), 10.07 (m, 2H), 6.79-7.30 (m, 4H), 5.58 (s, 1H), 3.64 (s, 3H), 2.20 (s, 3H). <sup>13</sup>C NMR (DMSO-d<sub>6</sub>, 62.5 MHz): 166.00, 160.72, 156.38, 152.44, 146.43, 139.33, 126.26, 124.42, 122.75, 115.31, 106.36, 51.03, 6.00.

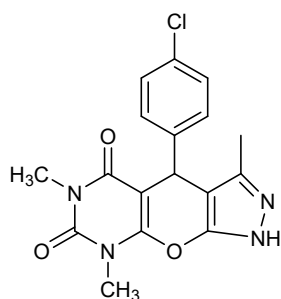

**4-(4-chlorophenyl)-3,6,8-trimethyl-4,8-dihydropyrazolo[4',3':5,6]pyrano[2,3-d]pyrimidine-5,7(1H,6H)-dione**

IR (KBr)  $\nu$  = 3390, 3189, 3062, 2971, 1688, 1559, 1498, 1416, 1264, 1133; <sup>1</sup>H NMR (DMSO-d<sub>6</sub>, 250 MHz):  $\delta$  13.95 (s, 1H), 7.41 – 6.96 (d-d, 4H), 4.43 (s, 1H), 3.40 (s, 3H), 1.98 (s, 3H), 1.68 (s, 3H). <sup>13</sup>C NMR (DMSO-d<sub>6</sub>, 62.5 MHz): 178.86, 160.28, 158.08, 154.89, 140.59, 137.46, 134.35, 129.77, 127.63, 127.58, 101.47, 55.45, 12.66, 9.92.

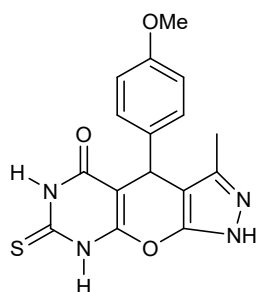

**4-(4-methoxyphenyl)-3-methyl-7-thioxo-4,6,7,8-tetrahydropyrazolo[4',3':5,6]pyrano[2,3-d]pyrimidin-5(1H)-one**

IR (KBr)  $\nu$  = 3230, 2997, 2827, 1620, 1518, 1404, 1173;  $^1\text{H}$  NMR (DMSO- $d_6$ , 250 MHz): 11.44 (s, 2H), 6.90 (d, 2H), 6.73 (d, 2H), 5.35 (s, 1H), 3.66 (s, 3H), 2.21 (s, 3H).  $^{13}\text{C}$  NMR (DMSO- $d_6$ , 62.5 MHz): 173.37, 163.73, 159.72, 157.10, 143.83, 134.14, 133.27, 128.11, 128.05, 113.75, 106.03, 96.62, 55.38, 30.25, 10.45

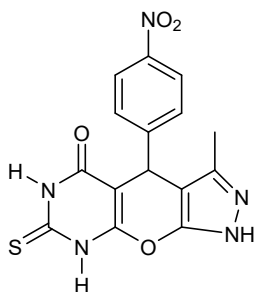

**3-methyl-4-(4-nitrophenyl)-7-thioxo-4,6,7,8-tetrahydropyrazolo[4',3':5,6]pyrano[2,3-d]pyrimidin-5(1H)-one**

IR (KBr)  $\nu$  = 3429, 2976, 2879, 16188, 1527, 1433, 1310, 1169, 1116;  $^1\text{H}$  NMR (DMSO- $d_6$ , 250 MHz):  $\delta$  11.49 (d, 2H), 8.68 (s, 1H), 7.37 – 6.96 (d-d, 4H), 5.35 (s, 1H), 2.22 (s, 3H).  $^{13}\text{C}$  NMR (DMSO- $d_6$ , 62.5 MHz): 168.99, 159.05, 154.87, 139.55, 137.18, 127.85, 126.55, 124.80, 114.39, 91.52, 5.75.

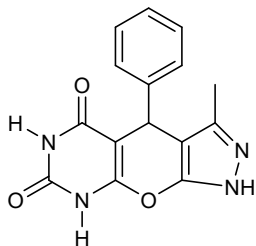

**3-methyl-4-phenyl-4,8-dihydropyrazolo[4',3':5,6]pyrano[2,3-d]pyrimidine-5,7(1H,6H)-dione**

IR (KBr): 3476, 3264, 3116, 2885, 2257, 1650, 1600, 1520, 1452, 1352, 1106 $\text{cm}^{-1}$ ;  $^1\text{H}$  NMR (250 MHz, DMSO)  $\delta$  11.11 (s, 1H), 10.09 – 10.03 (d, 2H), 7.18-7.02 (m, 5H), 5.39 (s, 1H), 2.18 (s, 3H).

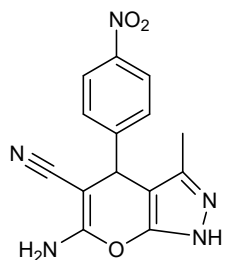

**6-Amino-4-(4-Nitrophenyl)-3-methyl-2,4-dihydropyrano[2,3-c] pyrazole-5-carbonitrile :**

IR (KBr:  $\nu/\text{cm}^{-1}$ ): 3476, 3228, 2196, 1650, 1600  $\text{cm}^{-1}$  ;  $^1\text{H}$  NMR (250 MHz, DMSO)  $\delta$  12.19 (s, 1H), 8.18 (d,  $J = 8.3$  Hz, 2H), 7.44 (d,  $J = 8.4$  Hz, 2H), 7.04 (s, 2H), 4.81 (s, 1H), 1.77 (s, 3H). C NMR (125 MHz, DMSO- $d_6$ );  $\delta\text{C}$  (ppm) = 161.54, 155.09, 152.51, 146.80, 136.29, 129.24, 129.24, 127.05, 124.30, 120.88, 96.95, 56.33, 36.30, 10.4.

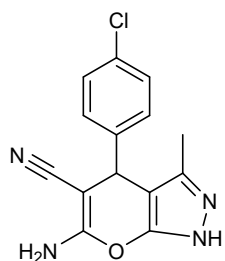

**6-Amino-4-(4-chlorophenyl)-3-methyl-2,4-dihydropyrano[2,3-c] pyrazole-5-carbonitrile :**

IR (KBr)  $\nu =$  3390, 3189, 3062, 2971, 1688, 1559, 1498, 1416, 1264, 1133;  $^1\text{H}$  NMR (DMSO- $d_6$ , 250 MHz):  $\delta$  13.95 (s, 1H), 7.41 – 6.96 (d-d, 4H), 4.43 (s, 1H), 3.40 (s, 3H), 1.98 (s, 3H), 1.68 (s, 3H). C NMR (DMSO- $d_6$ , 62.5 MHz): 178.86, 160.28, 158.08, 154.89, 140.59, 137.46, 134.35, 129.77, 127.63, 127.58, 101.47, 55.45, 12.66, 9.92.

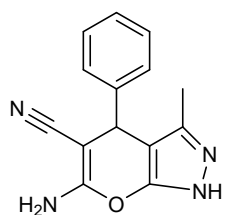

**6-amino-3-methyl-4-phenyl-1,4-dihydropyrano[2,3-c]pyrazole-5-carbonitrile**

IR (KBr): 3377, 3029, 2189, 1645, 1526  $\text{cm}^{-1}$  ;  $^1\text{H}$  NMR (250 MHz, DMSO)  $\delta$  12.08 (s, 1H), 7.64 – 6.86 (m, 5H), 6.26 – 4.47 (s, 2H), 1.90 (s, 3H).

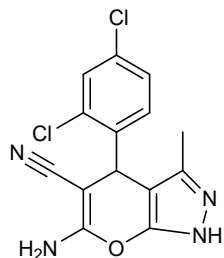

**4-(2,4-chlorophenyl)-3,6,8-trimethyl-4,8-dihydropyrazolo[4',3':5,6]pyrano[2,3-d]pyrimidine-5,7(1H,6H)-dione**

IR (KBr)  $\nu$  = 3433, 2923, 2358, 1730, 1583, 1464, 1383, 1203;  $^1\text{H}$  NMR (250 MHz, DMSO)  $\delta$  8.88 (s, 1H), 8.13 (s, 1H), 7.77 (s, 1H), 7.55 (s, 2H), 4.52 (s, 1H), 1.92 (s, 3H).

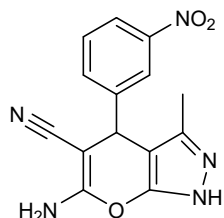

**6-amino-3-methyl-4-(3-nitrophenyl)-1,4-dihydropyrano[2,3-c]pyrazole-5-carbonitrile**

IR (KBr:  $\nu/\text{cm}^{-1}$ ): 3473, 3226, 2193, 1653, 1526  $\text{cm}^{-1}$ ;  $^1\text{H}$  NMR (250 MHz, DMSO)  $\delta$  12.20 (s, 1H), 7.04 – 8.11 (m, 4H), 8.80 (s, 2H), 4.86 (s, 1H), 1.79 (s, 3H).  $^{13}\text{C}$  NMR (125 MHz, DMSO- $d_6$ );  $\delta\text{C}$  (ppm) = 156.96, 150.49, 143.70, 142.58, 131.75, 130.14, 125.99, 117.67, 116.29, 92.42, 52.01, 5.51.

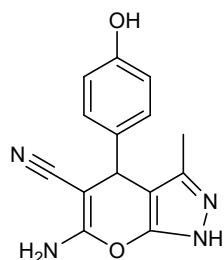

**6-amino-4-(4-hydroxyphenyl)-3-methyl-1,4-dihydropyrano[2,3-c]pyrazole-5-carbonitrile**

IR (KBr): 3395, 3137, 2176, 1647, 1604  $\text{cm}^{-1}$ ;  $^1\text{H}$  NMR (250 MHz, DMSO)  $\delta$  12.04 (s, 1H), 9.29 (s, 1H), 6.92 (s, 2H), 6.95 (m, 2H), 6.88 (m, 2H), 4.41 (s, 1H), 1.76 (s, 3H).  $^{13}\text{C}$  NMR (125 MHz, DMSO- $d_6$ );  $\delta\text{C}$  (ppm) = 156.44, 151.83, 150.54, 131.36, 130.56, 124.23, 116.70, 110.92, 110.28, 93.86, 53.64, 5.54.

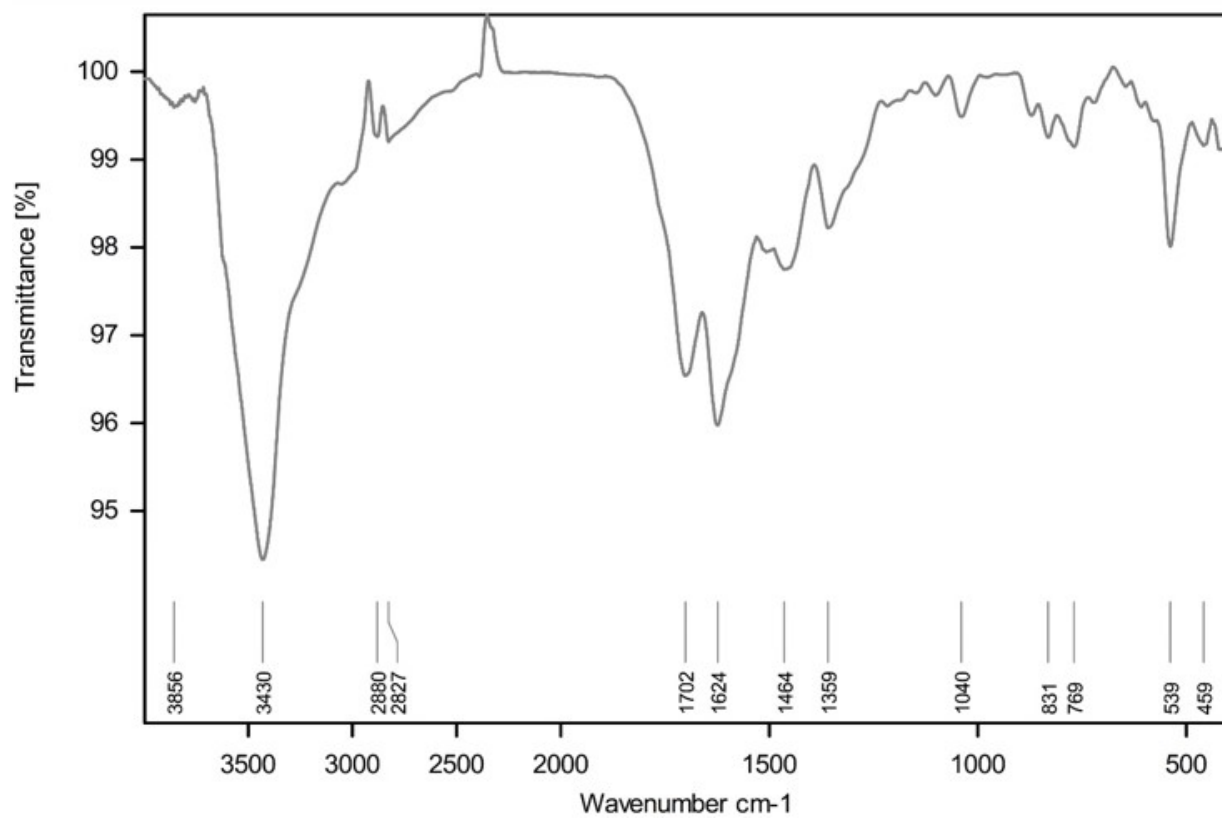

**Figure S1.** FT-IR of 4-(4-methoxyphenyl)-3-methyl-4,8-dihydropyrazolo[4',3':5,6]pyrano[2,3-d]pyrimidine-5,7(1H,6H)-dione in KBr.

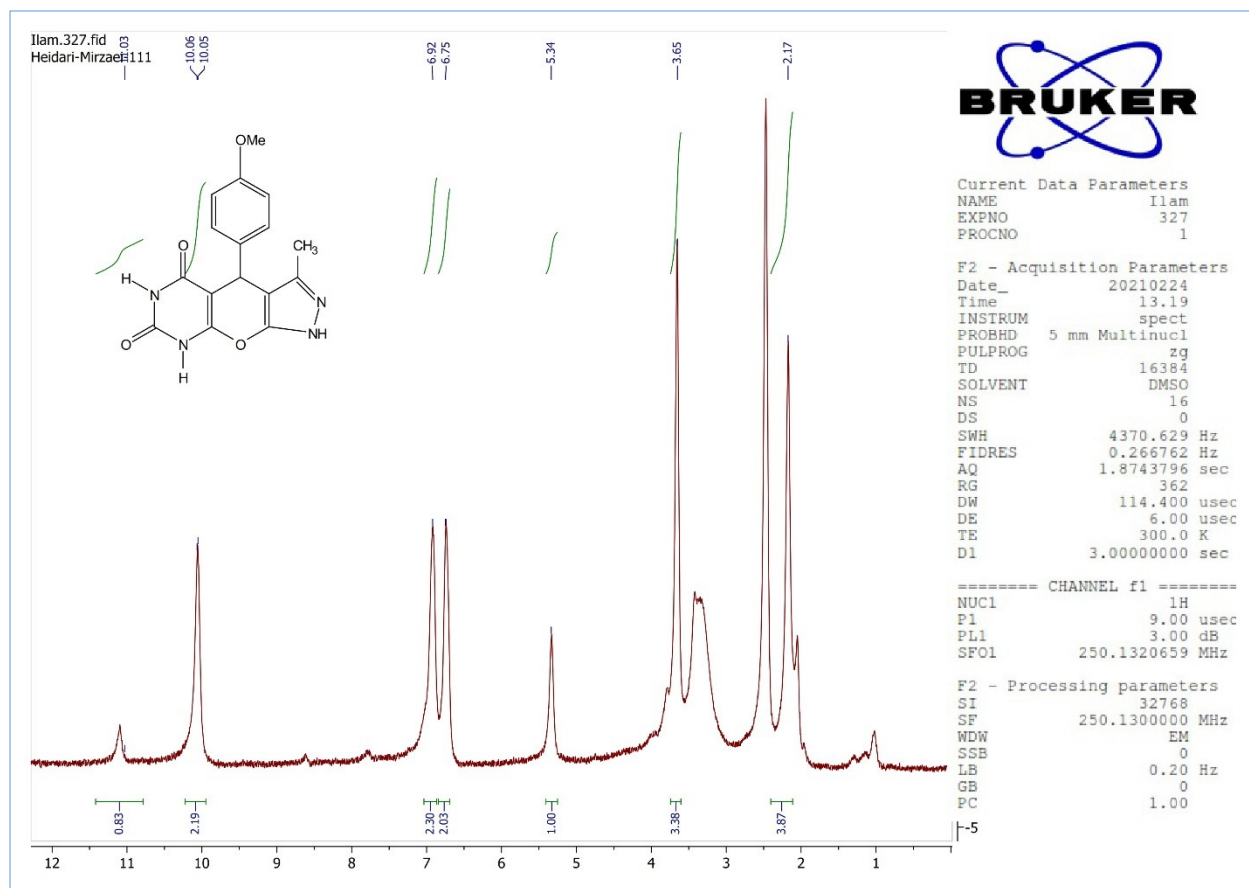

**Figure S2.**  $^1\text{H}$  NMR of 4-(4-methoxyphenyl)-3-methyl-4,8-dihydropyrazolo[4',3':5,6]pyrano[2,3-d]pyrimidine-5,7(1H,6H)-dione in DMSO.

Mirzaei-Heidari-111

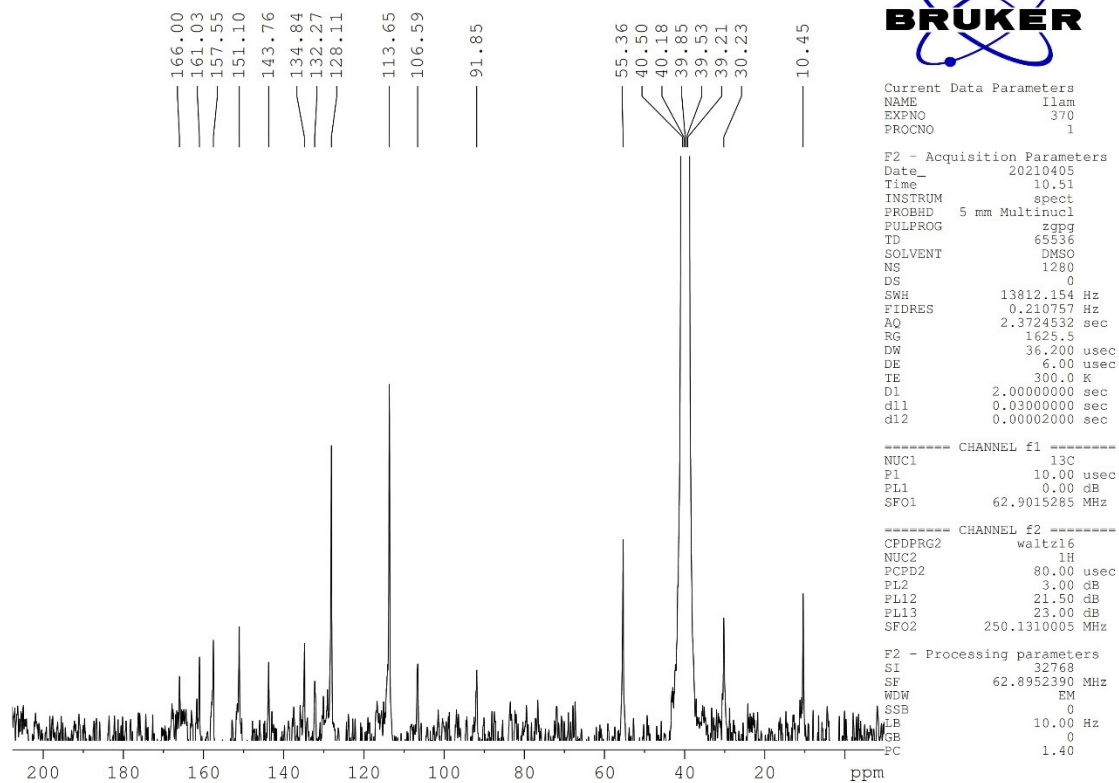

**Figure S3.**  $^{13}\text{C}$  NMR of 4-(4-methoxyphenyl)-3-methyl-4,8-dihydropyrazolo[4,3':5,6]pyrano[2,3-d]pyrimidine-5,7(1H,6H)-dione in DMSO.



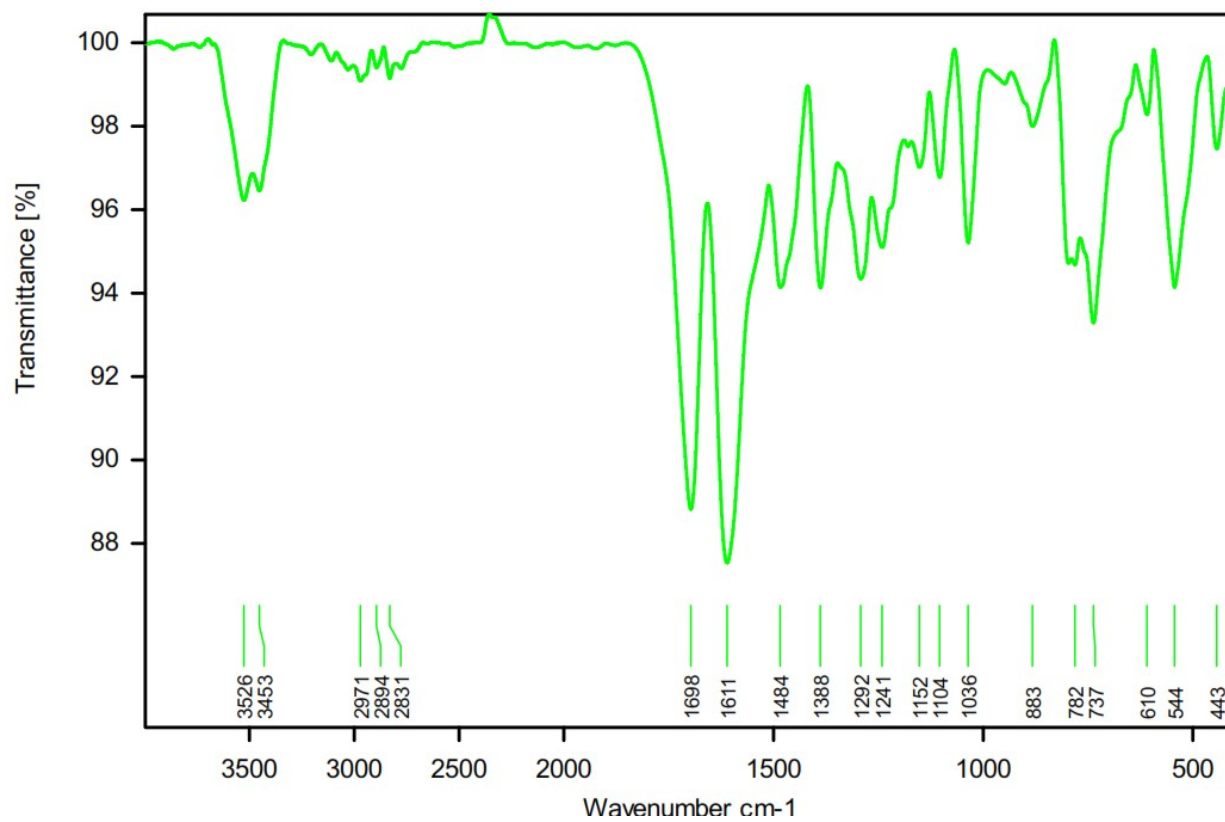

**Figure S4.** FT-IR of 4-(2-methoxyphenyl)-3-methyl-4,8-dihydropyrazolo[4',3':5,6]pyrano[2,3-d]pyrimidine-5,7(1H,6H)-dione in KBr.

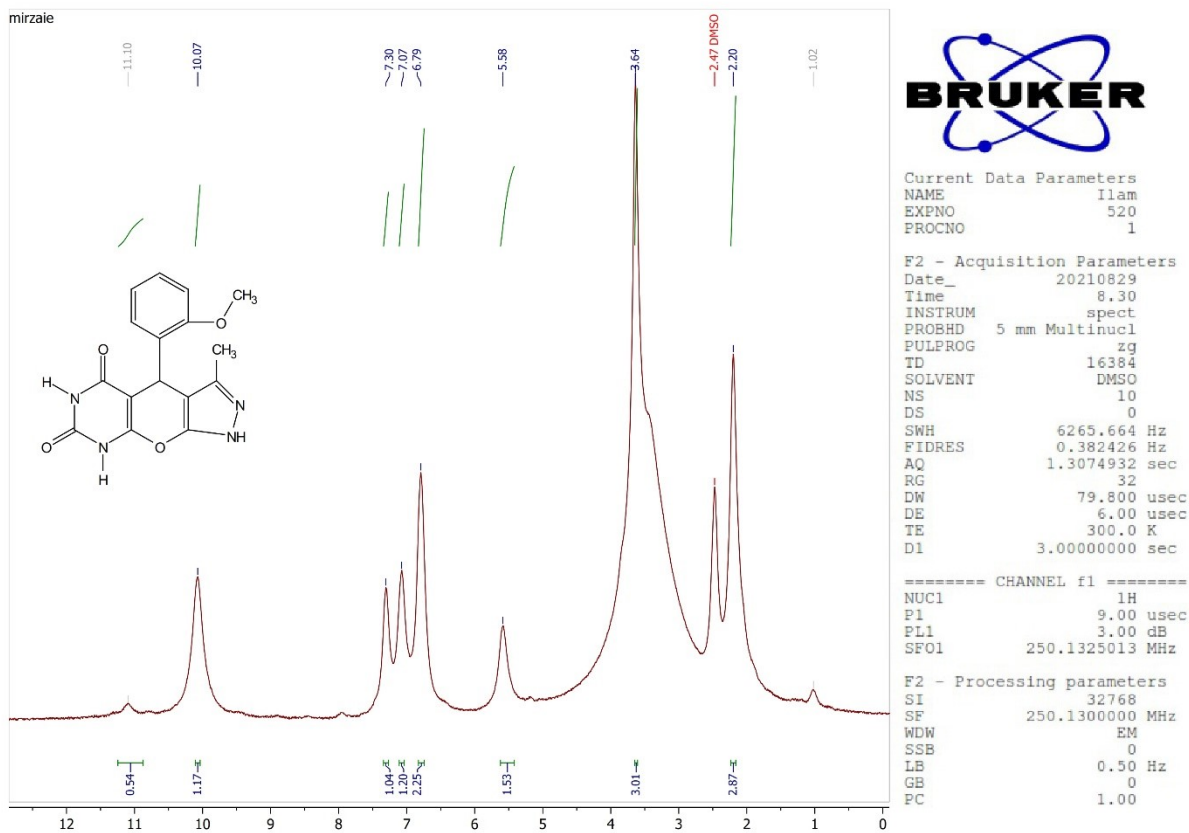

**Figure S5.**  $^1\text{H}$  NMR of 4-(2-methoxyphenyl)-3-methyl-4,8-dihydropyrazolo[4',3':5,6]pyrano[2,3-d]pyrimidine-5,7(1H,6H)-dione in DMSO.

Mirzaei-AM1

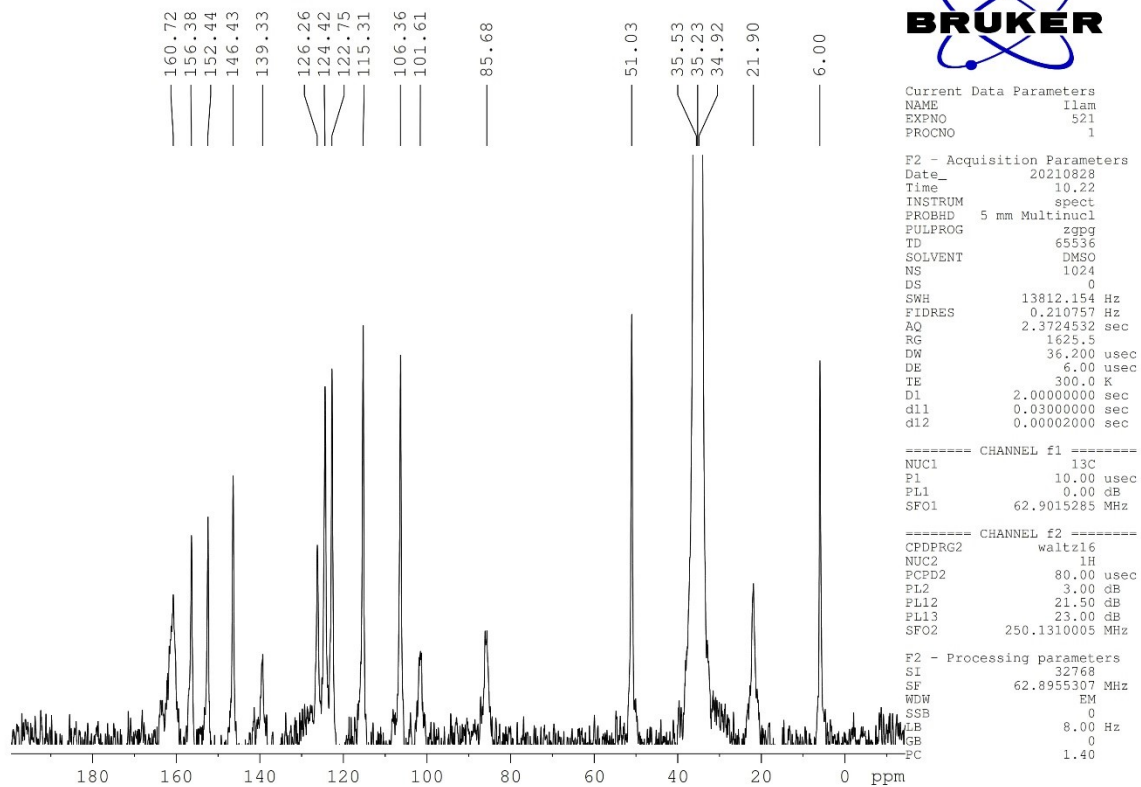

**Figure S6.**  $^{13}\text{C}$  NMR of 4-(2-methoxyphenyl)-3-methyl-4,8-dihydropyrazolo[4',3':5,6]pyrano[2,3-d]pyrimidine-5,7(1H,6H)-dione in DMSO.

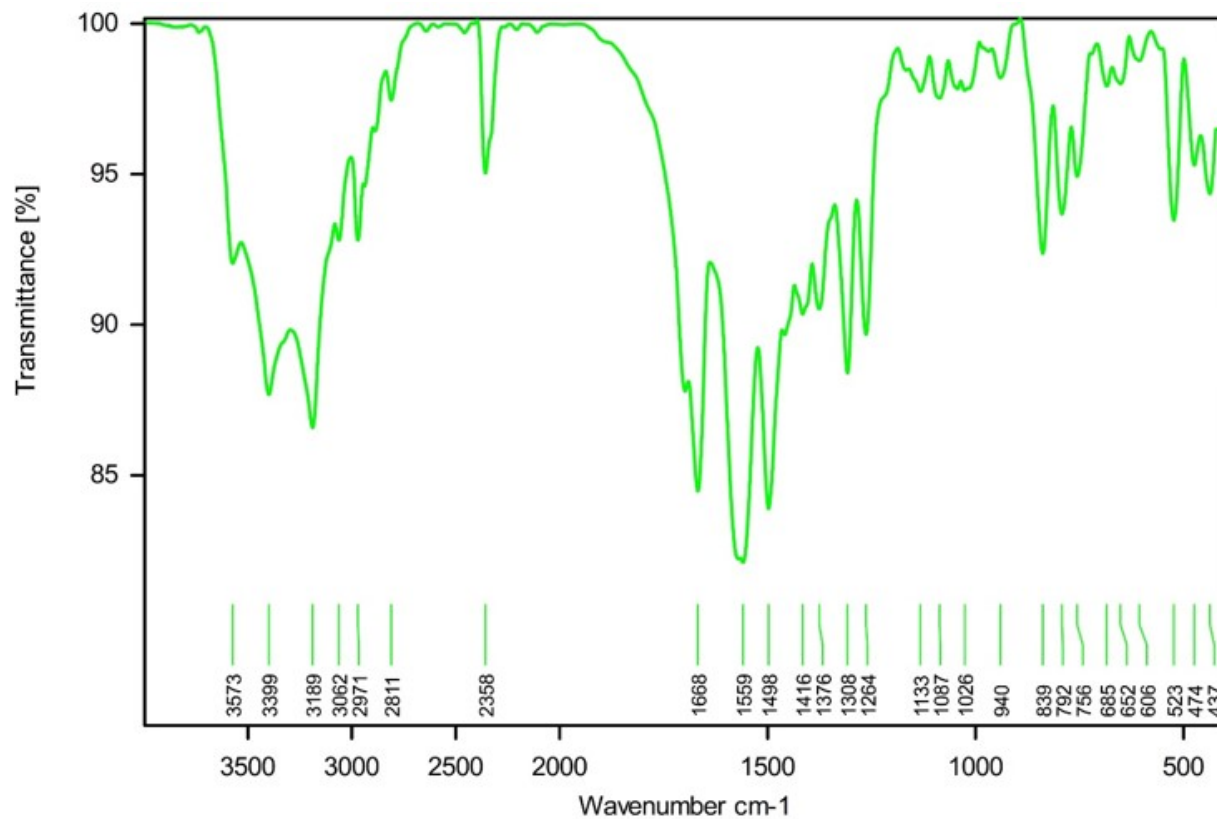

**Figure S7.** FT-IR of 4-(4-chlorophenyl)-3,6,8-trimethyl-4,8-dihydropyrazolo[4',3':5,6]pyrano[2,3-d]pyrimidine-5,7(1H,6H)-dione in KBr.

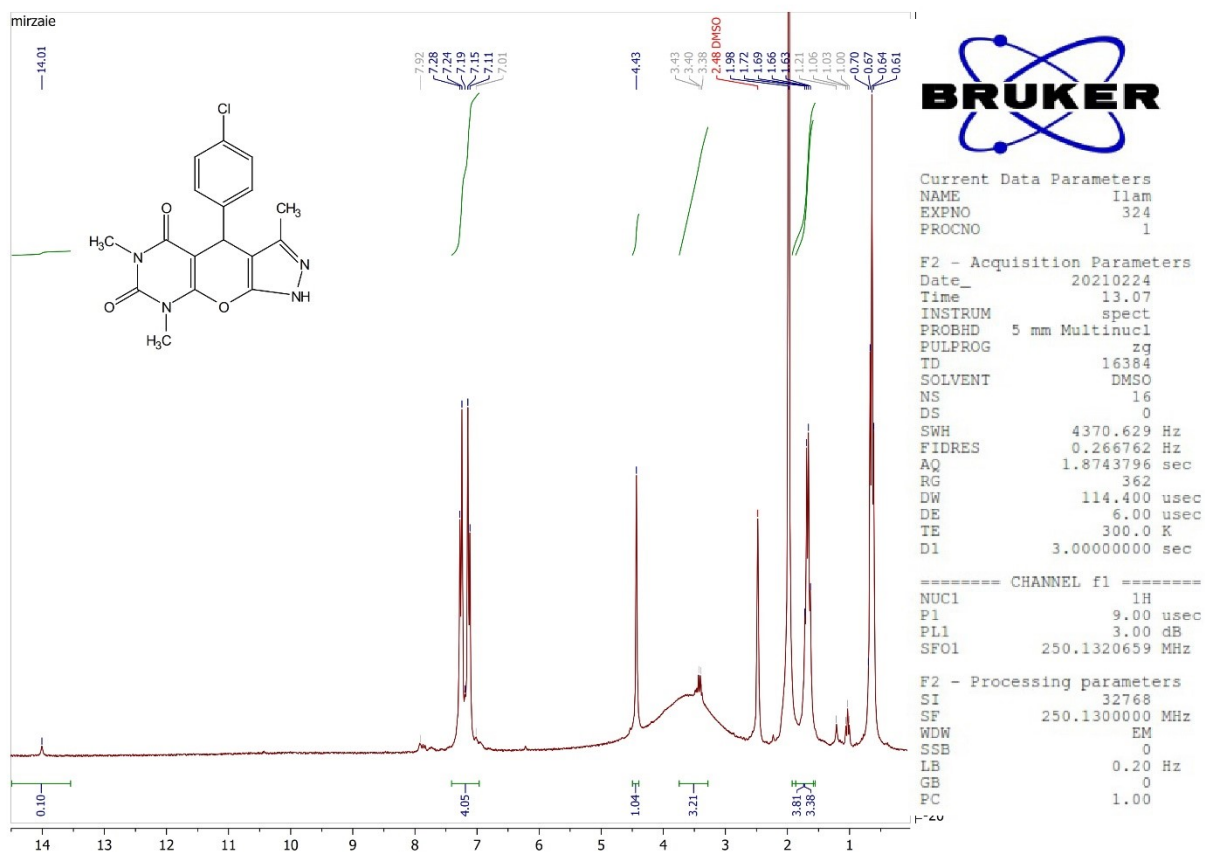

**Figure S8.**  $^1\text{H}$  NMR of 4-(4-chlorophenyl)-3,6,8-trimethyl-4,8-dihydropyrazolo[4',3':5,6]pyrano[2,3-d]pyrimidine-5,7(1H,6H)-dione in DMSO.

Mirzaei-Heidari-109

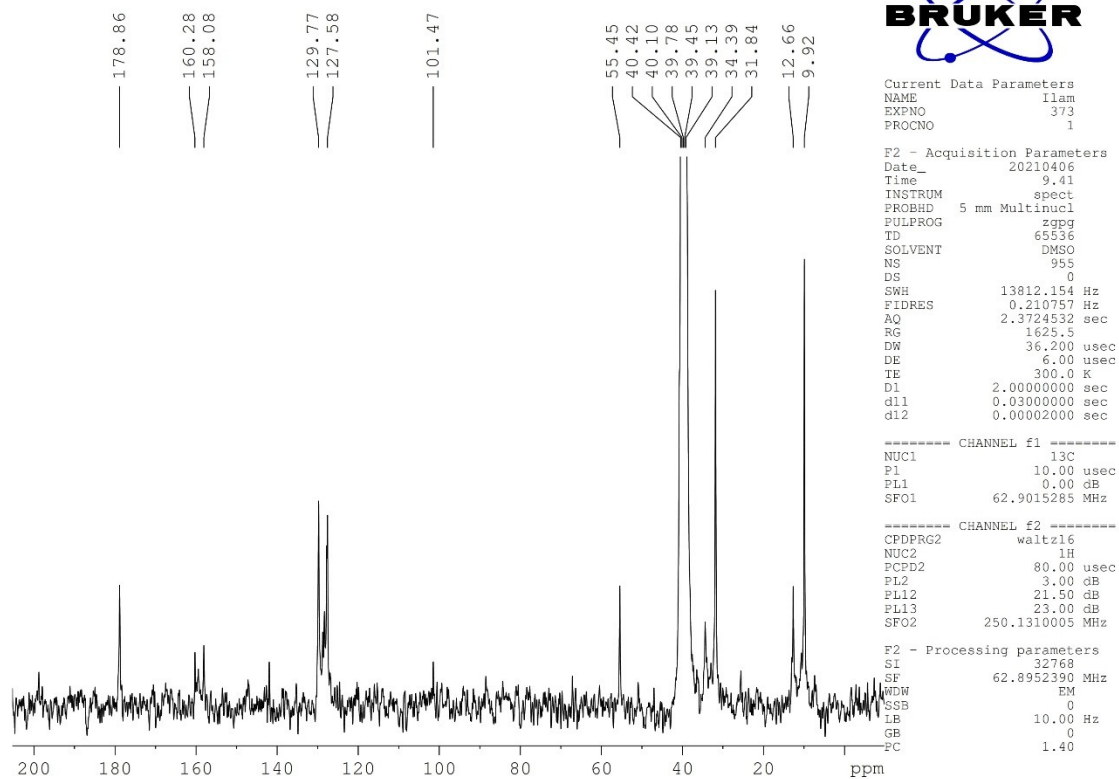

**Figure S9.**  $^{13}\text{C}$  NMR of 4-(4-chlorophenyl)-3,6,8-trimethyl-4,8-dihydropyrazolo[4',3':5,6]pyrano[2,3-d]pyrimidine-5,7(1H,6H)-dione in DMSO.

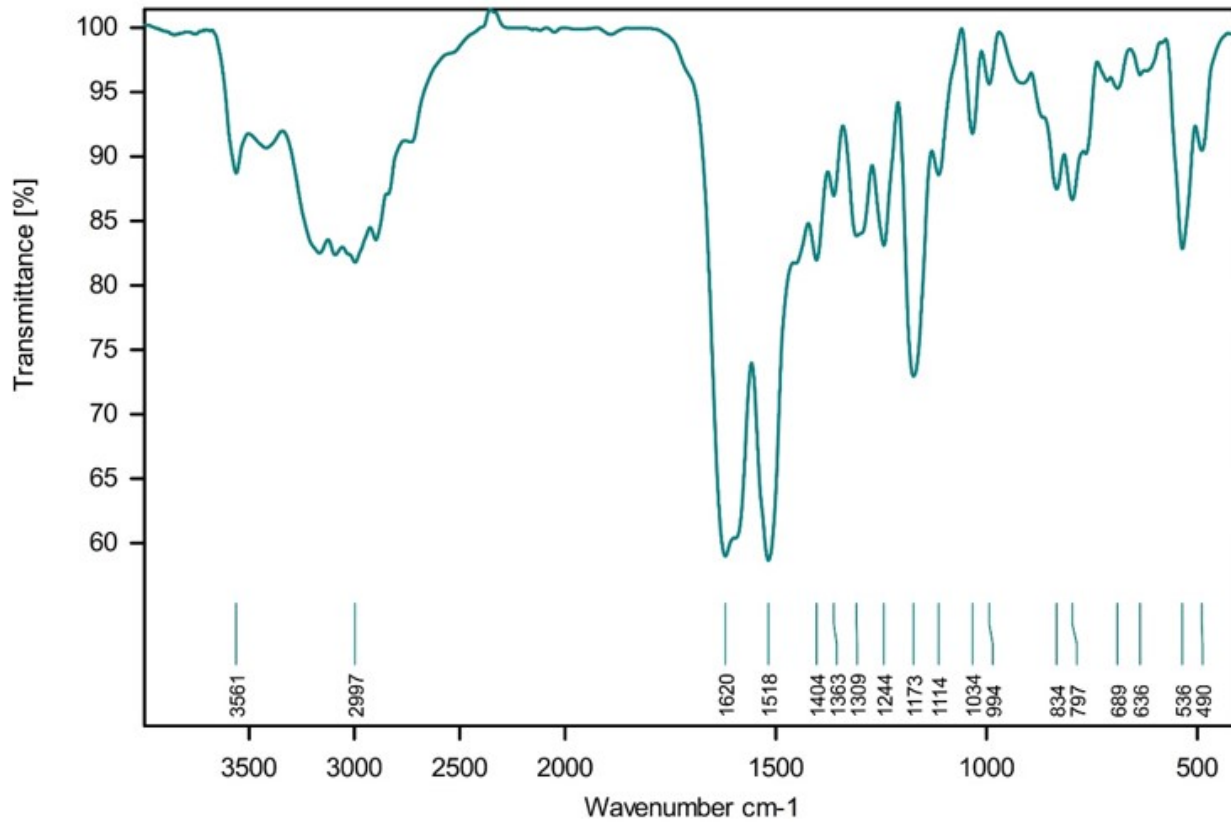

**Figure S10.** FTIR of 4(4-methoxyphenyl)-3-methyl-7-thioxo-4,6,7,8-tetrahydropyrazolo[4',3':5,6]pyrano[2,3-d]pyrimidin-5(1H)-one in KBr.

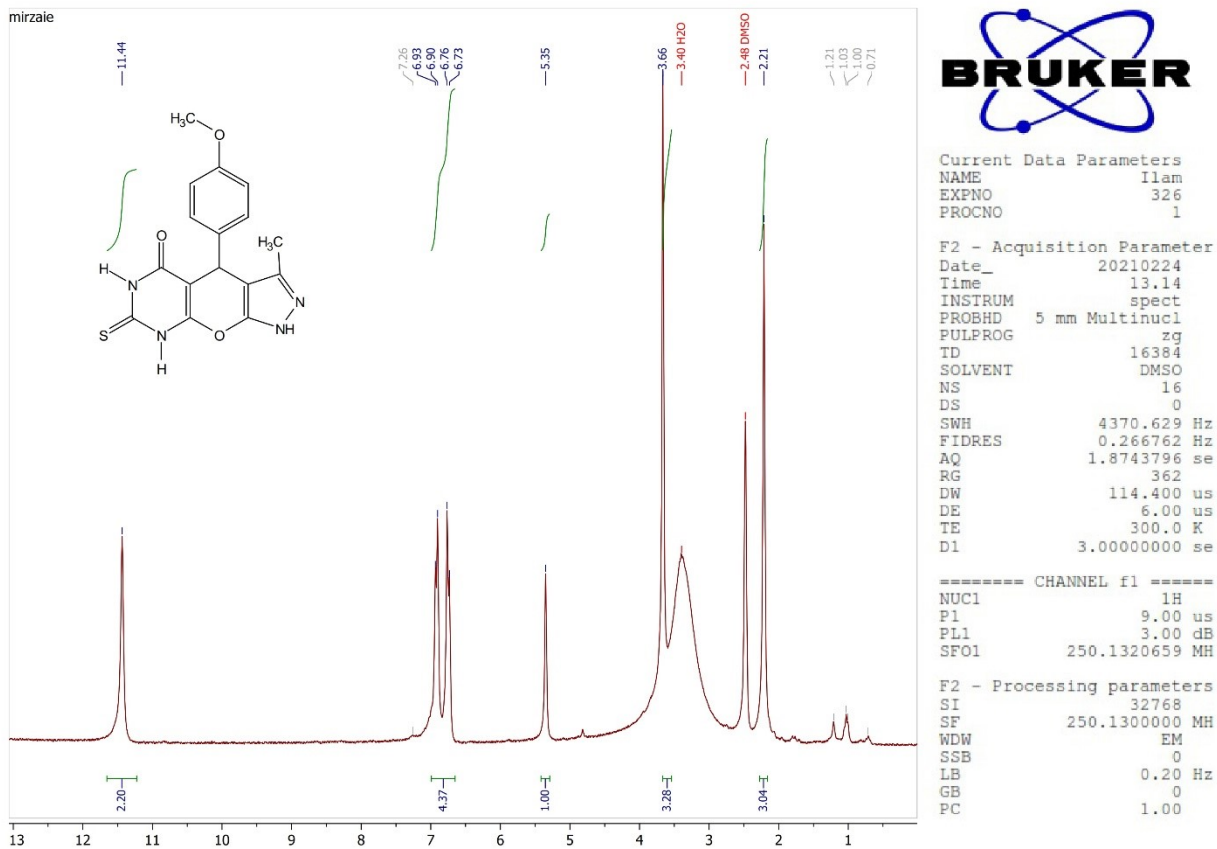

**FigureS11.**  $^1\text{H}$ NMR of 4-(4-methoxyphenyl)-3-methyl-7-thioxo-4,6,7,8-tetrahydropyrazolo[4',3':5,6]pyrano[2,3-d]pyrimidin-5(1H)-one in DMSO.



Mirzaei-Heidari-110

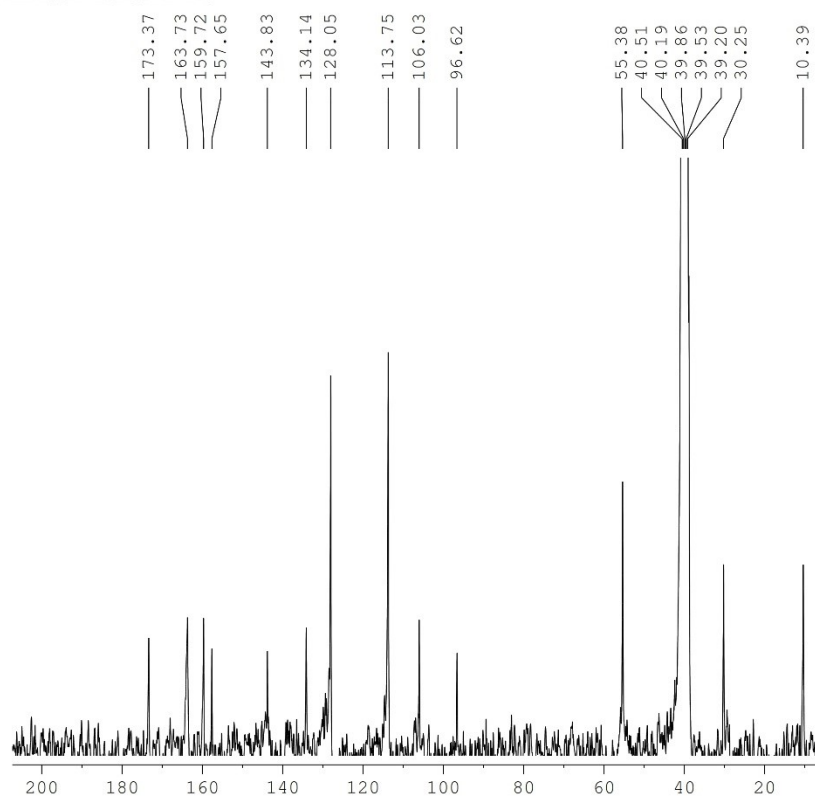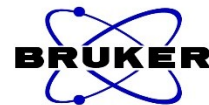

Current Data Parameters  
NAME 1lam  
EXPNO 369  
PROCNO 1

F2 - Acquisition Parameters  
Date\_ 20210405  
Time 8.47  
INSTRUM spect  
PROBHD 5 mm Multinucl  
PULPROG zgpg3  
ID 65536  
SOLVENT DMSO  
NS 944  
DS 0  
SWH 13812.154 Hz  
FIDRES 0.210757 Hz  
AQ 2.3724532 sec  
RG 1629.5  
DW 36.200 usec  
DE 6.00 usec  
TE 300.0 K  
D1 2.0000000 sec  
d11 0.03000000 sec  
d12 0.00002000 sec

----- CHANNEL f1 -----  
NUC1 13C  
P1 10.00 usec  
PL1 0.00 GB  
SFO1 62.9015285 MHz

----- CHANNEL f2 -----  
CPDPRG2 waltz16  
NUC2 1H  
PCPD2 80.00 usec  
PL2 3.00 GB  
PL12 21.50 GB  
PL13 23.00 GB  
SFO2 250.1310005 MHz

F2 - Processing parameters  
SI 32768  
SF 62.8952390 MHz  
WDW EM  
SSB 0  
LB 10.00 Hz  
GB 0  
FC 1.40

**FigureS12.**  $^{13}\text{C}$  NMR of 4(4-methoxyphenyl)-3-methyl-7-thioxo-4,6,7,8-tetrahydropyrazolo[4',3':5,6]pyrano[2,3-d]pyrimidin-5(1H)-one in DMSO.

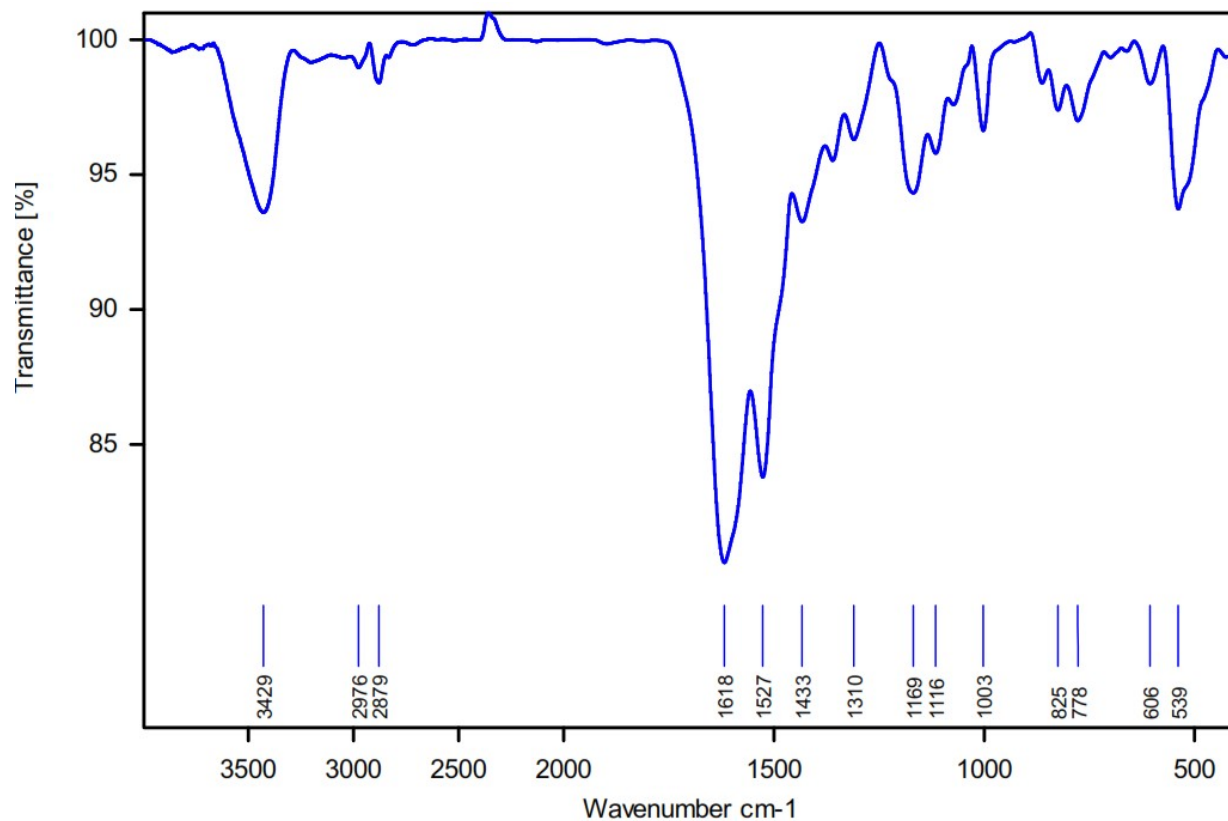

**Figure S13.** FTIR of 3-methyl-4-(4-nitrophenyl)-7-thioxo-4,6,7,8-tetrahydropyrazolo[4',3':5,6]pyrano[2,3-d]pyrimidin-5(1H)-one KBr.

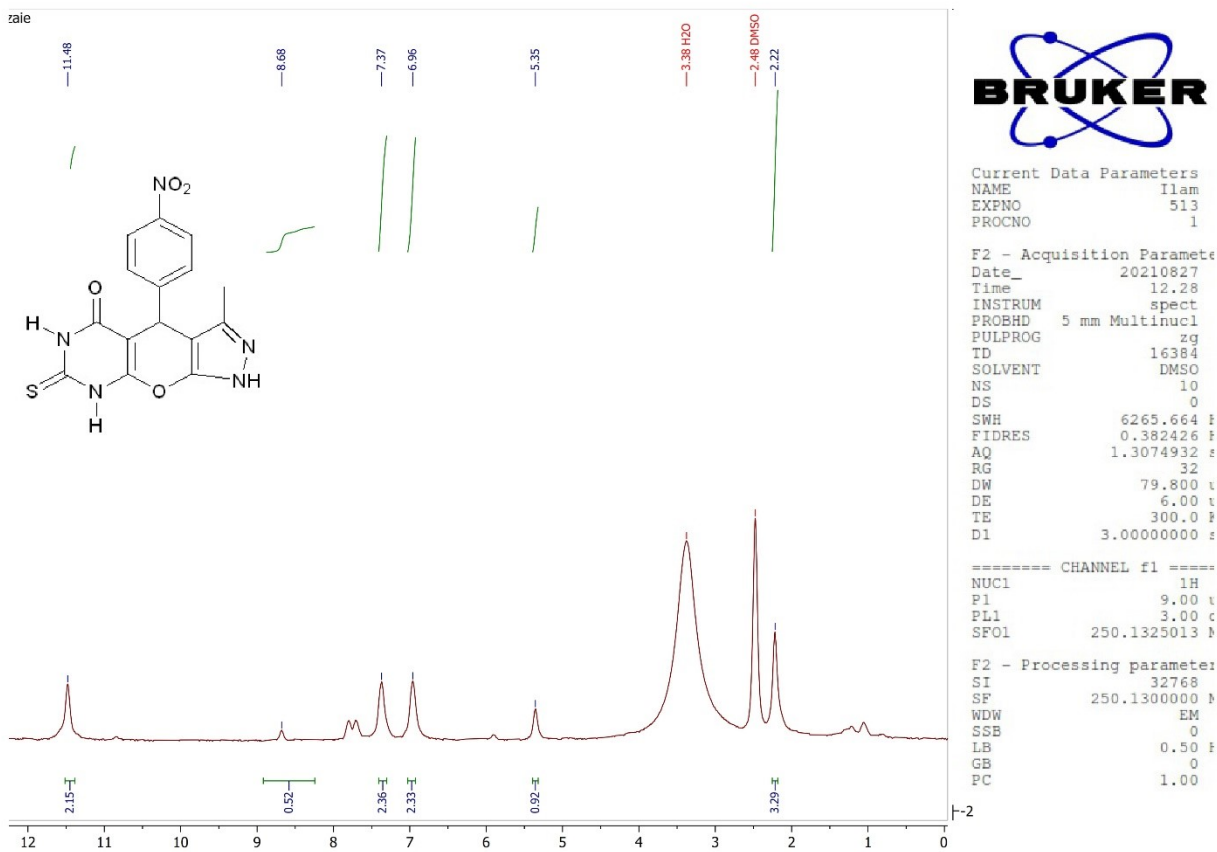

**Figure S14.** <sup>1</sup>H NMR of 3-methyl-4-(4-nitrophenyl)-7-thioxo-4,6,7,8-tetrahydropyrazolo[4',3':5,6]pyrano[2,3-d]pyrimidin-5(1H)-one in DMSO.

Mirzaei-AM2-1402-6-5

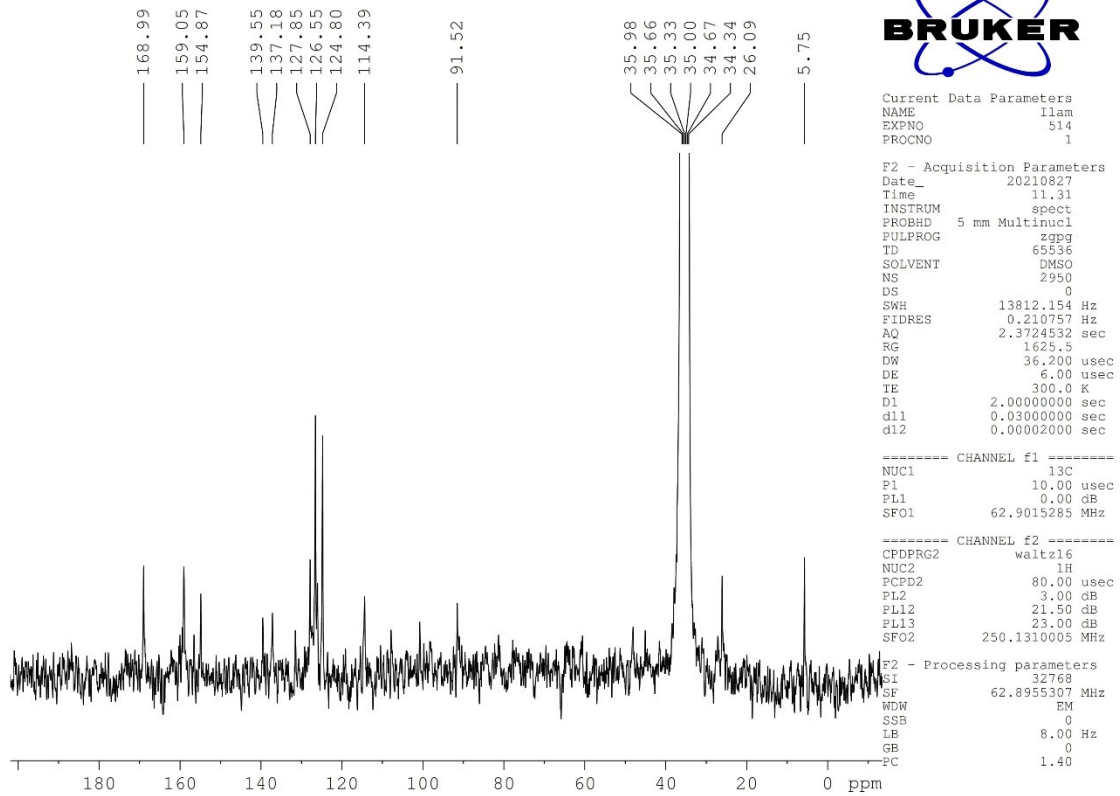

**FigureS15.**  $^{13}\text{C}$  NMR of 3-methyl-4-(4-nitrophenyl)-7-thioxo-4,6,7,8-tetrahydropyrazolo[4',3':5,6]pyrano[2,3-d]pyrimidin-5(1H)-one in DMSO.

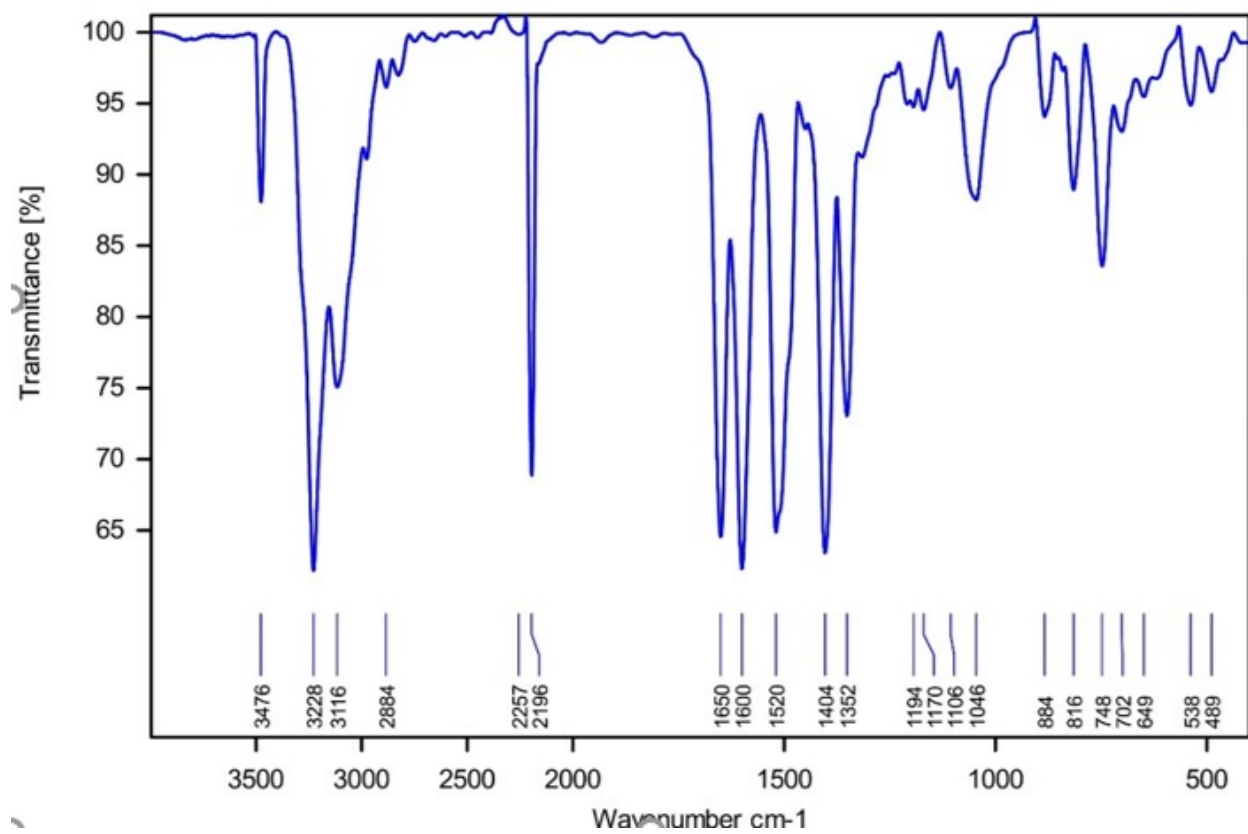

**Figure S16.** FT-IR of 3-methyl-4-phenyl-4,8-dihydropyrazolo[4',3':5,6]pyrano[2,3-d]pyrimidine-5,7(1H,6H)-dione in KBr.

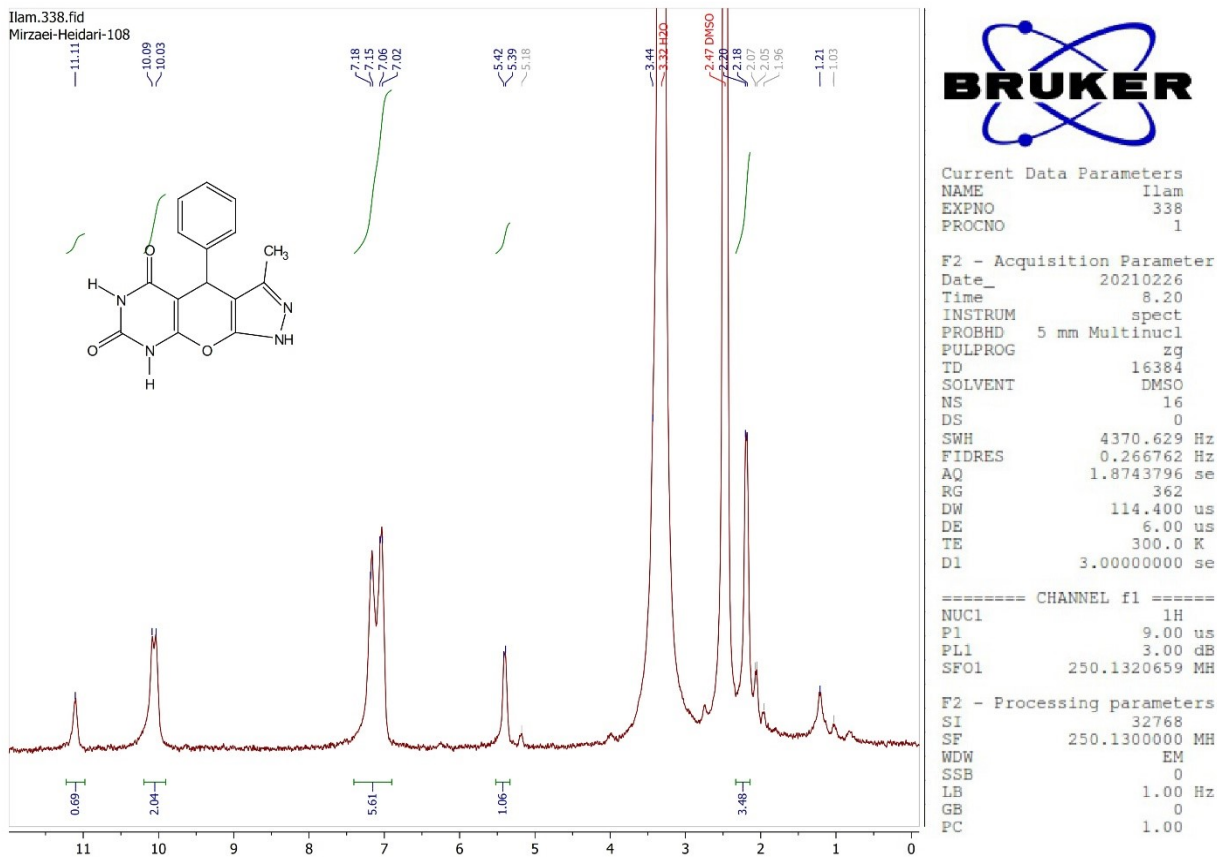

**Figure S17.**  $^1\text{H}$  NMR of 3-methyl-4-phenyl-4,8-dihydropyrazolo[4',3':5,6]pyrano[2,3-d]pyrimidine-5,7(1H,6H)-dione in DMSO.

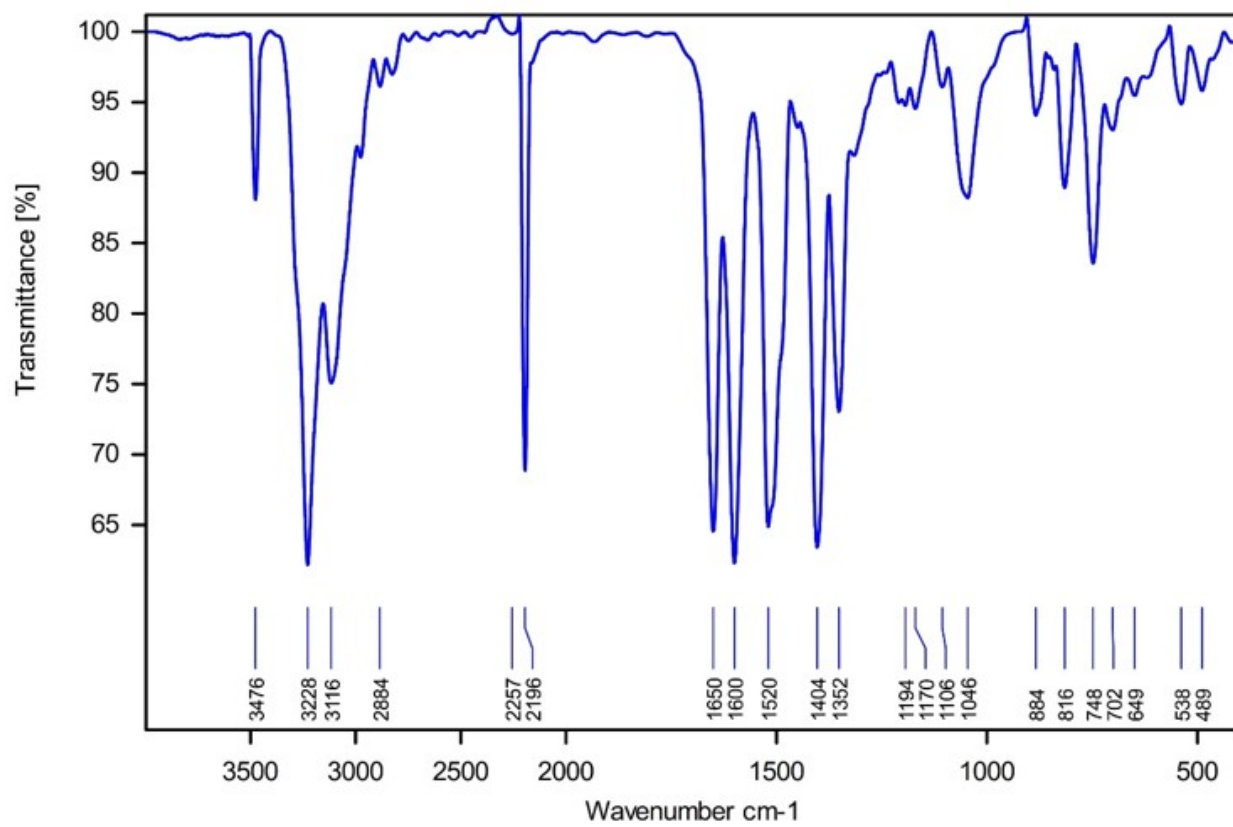

**Figure S18.** FT-IR of 6-Amino-4-(4-Nitrophenyl)-3-methyl-2,4-dihydropyrano[2,3-c] pyrazole-5-carbonitrile in KBr.

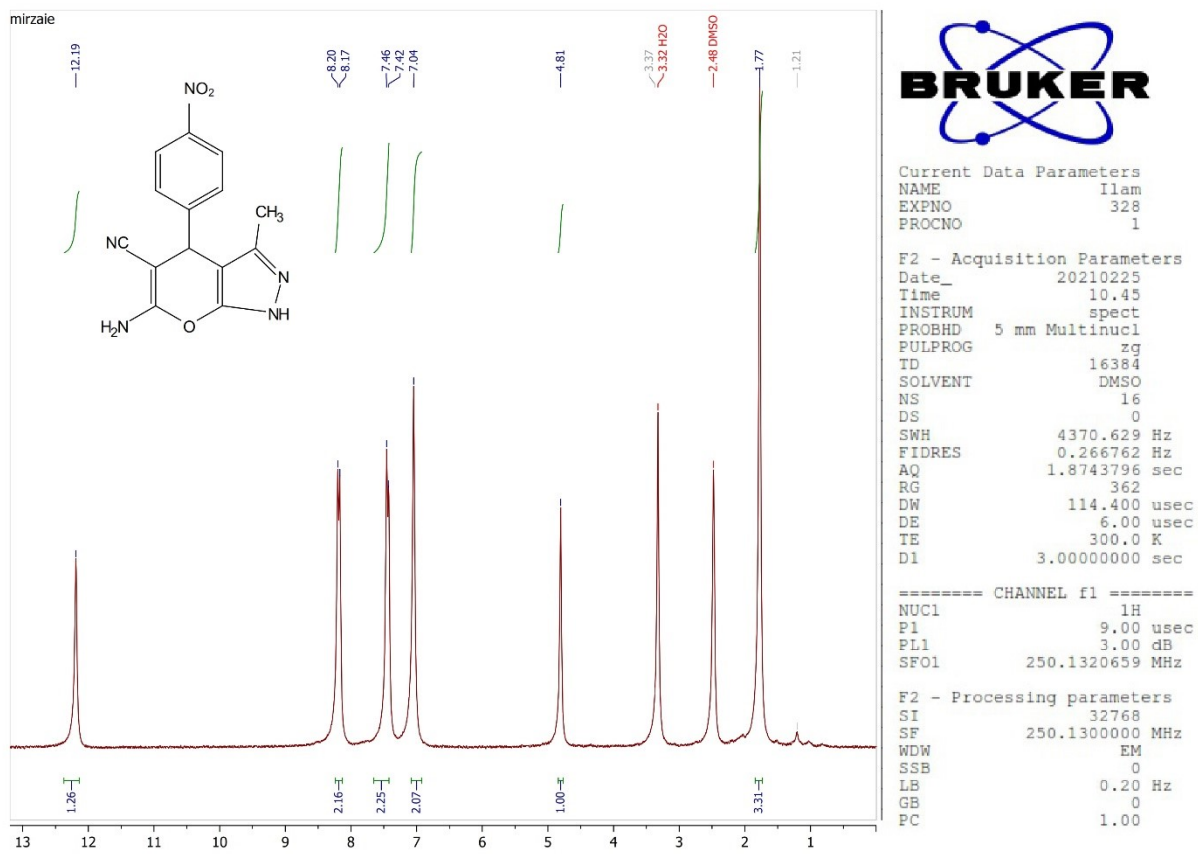

**Figure S19.**  $^1\text{H}$  NMR of 6-Amino-4-(4-Nitrophenyl)-3-methyl-2,4-dihydropyrano[2,3-c] pyrazole-5-carbonitrile one in DMSO.



Heidari-Mirzaei-100

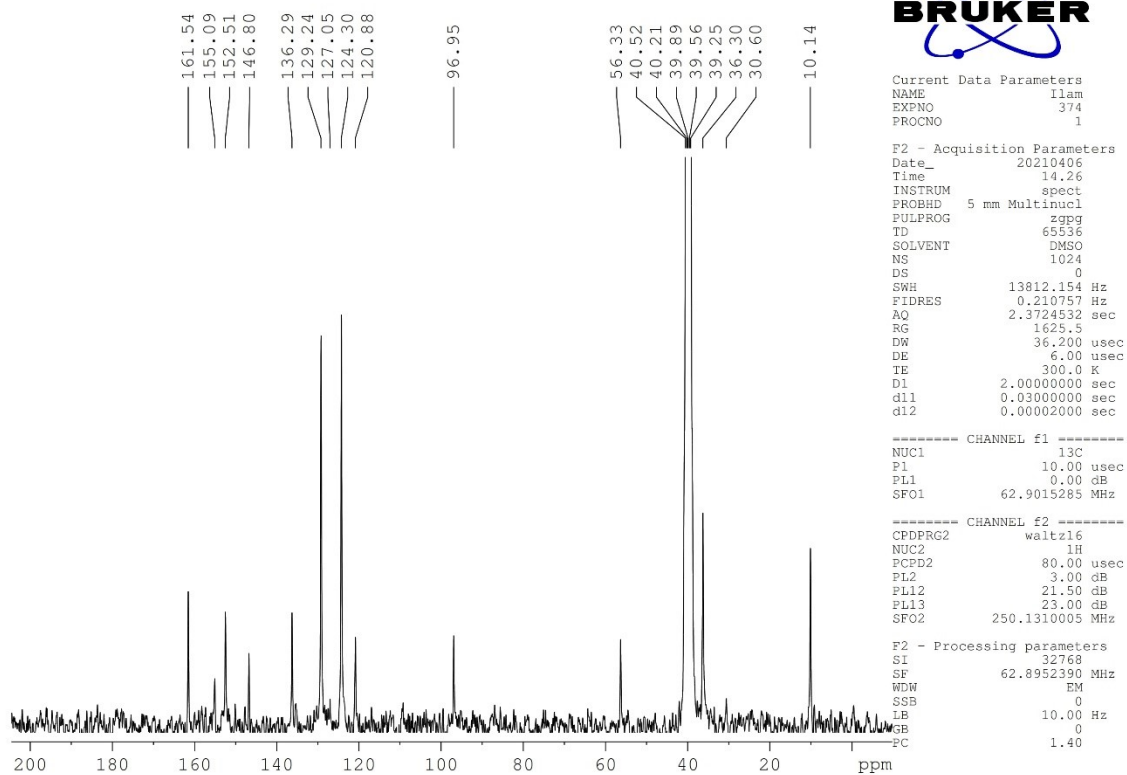

**Figure S20.**  $^{13}\text{C}$  NMR of 6-Amino-4-(4-Nitrophenyl)-3-methyl-2,4-dihydropyrano[2,3-c] pyrazole-5-carbonitrile in DMSO.

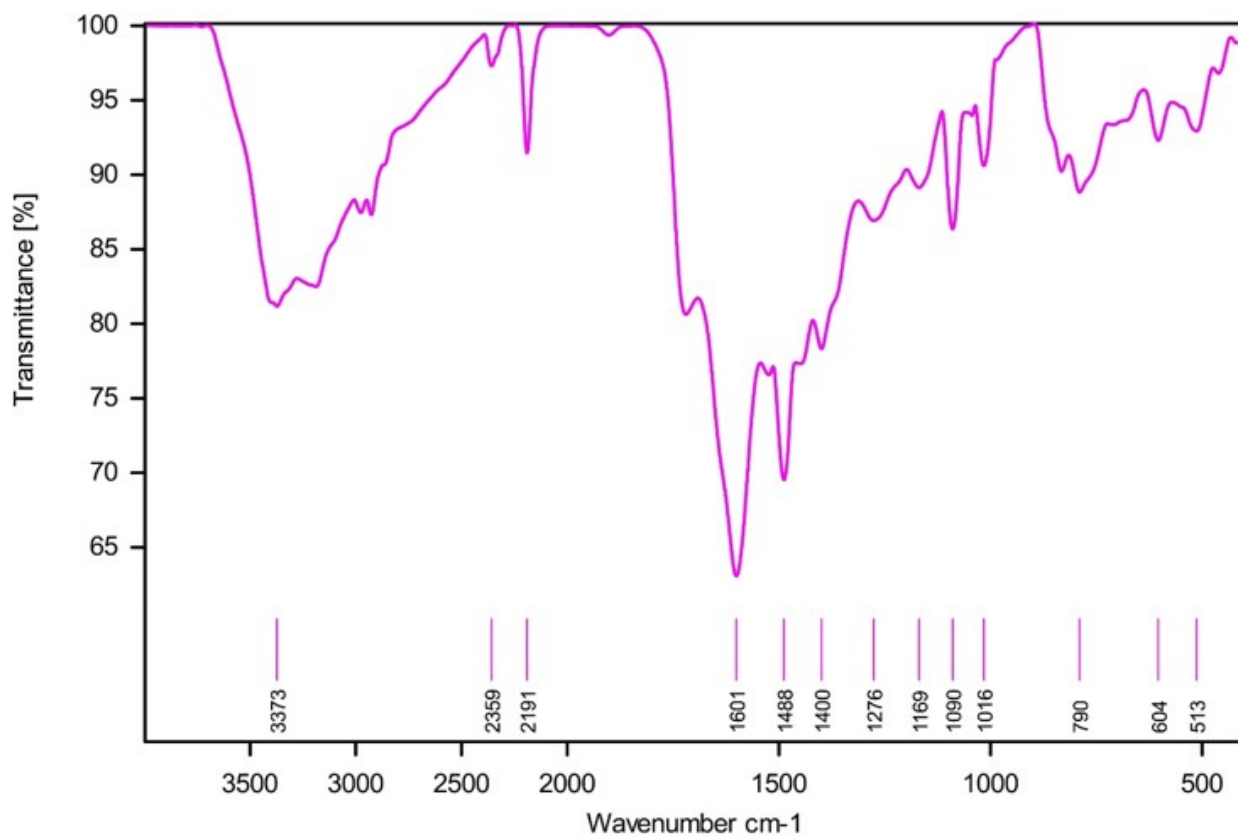

**Figure S21.** FT-IR of 6-Amino-4-(4-chlorophenyl)-3-methyl-2,4-dihydropyrano[2,3-c] pyrazole-5-carbonitrile in KBr.

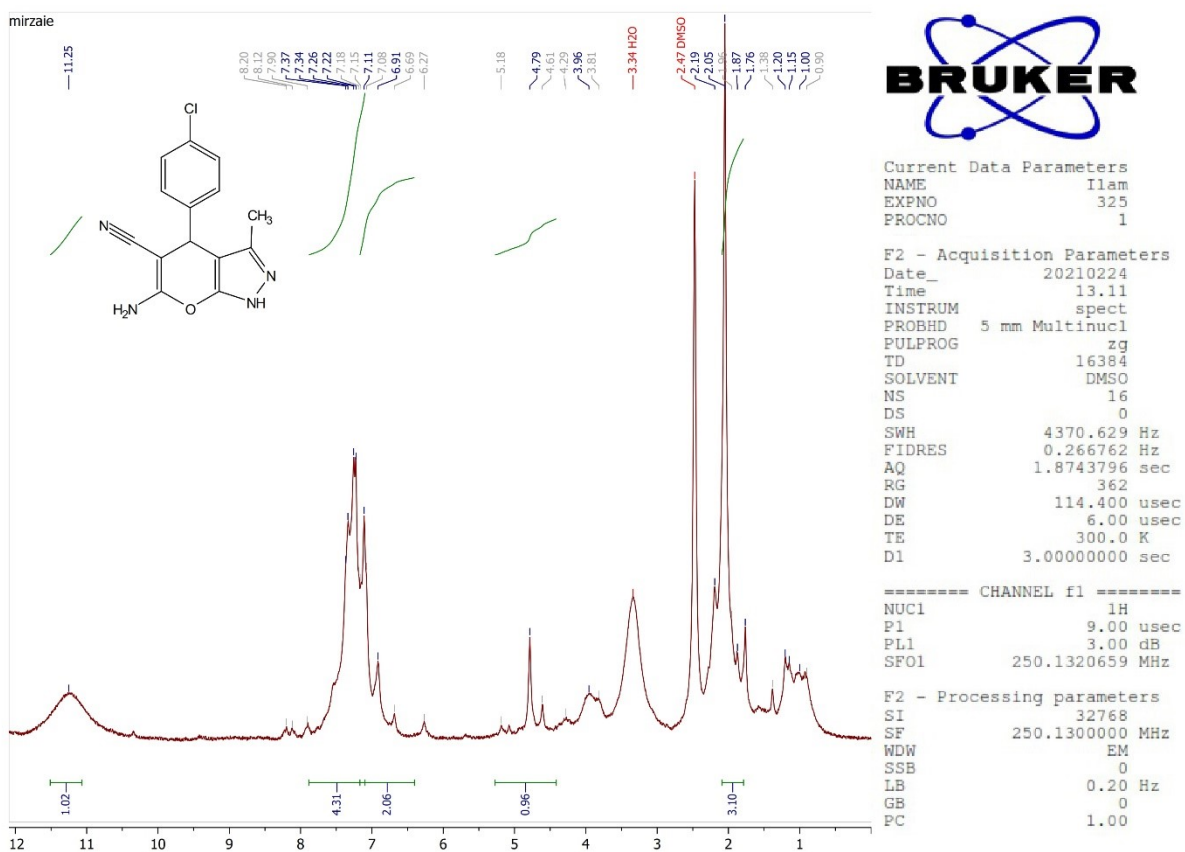

**Figure S22.**  $^1\text{H}$  NMR of 6-Amino-4-(4-chlorophenyl)-3-methyl-2,4-dihydropyrano[2,3-c]pyrazole-5-carbonitrile in DMSO.

Mirzaei-heidari-102

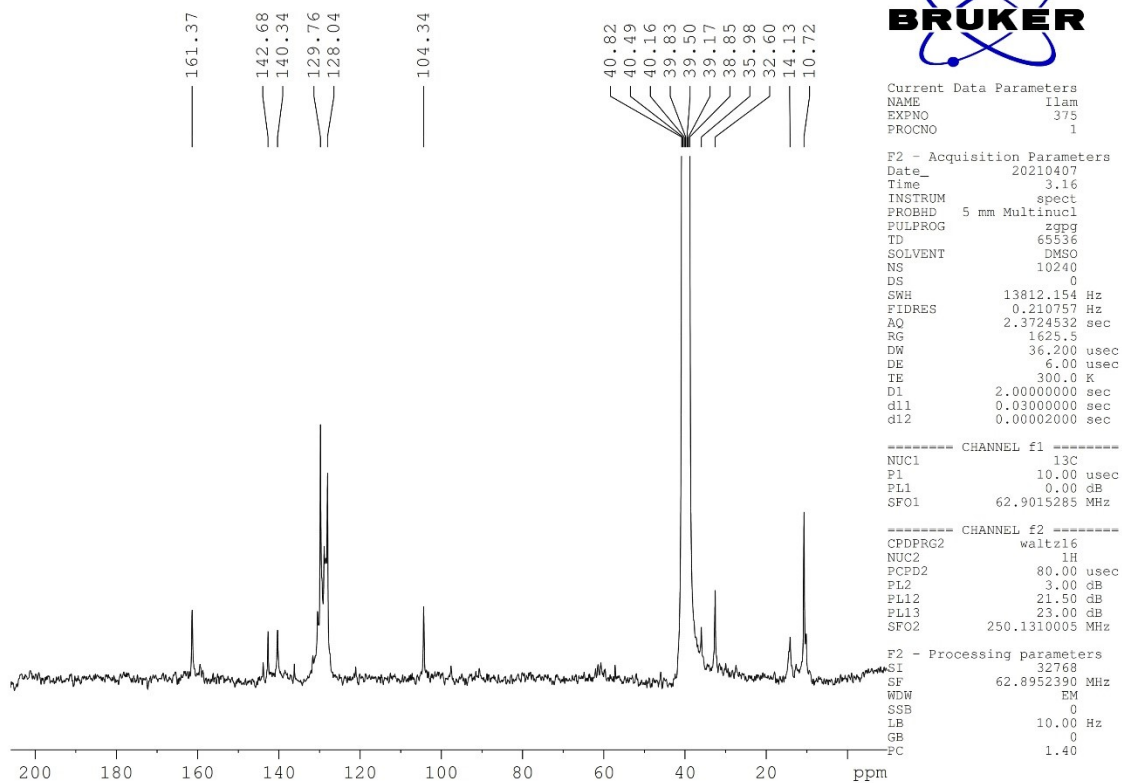

**Figure S23.**  $^{13}\text{C}$  NMR of 6-Amino-4-(4-chlorophenyl)-3-methyl-2,4-dihydropyrano[2,3-c] pyrazole-5-carbonitrile in DMSO.

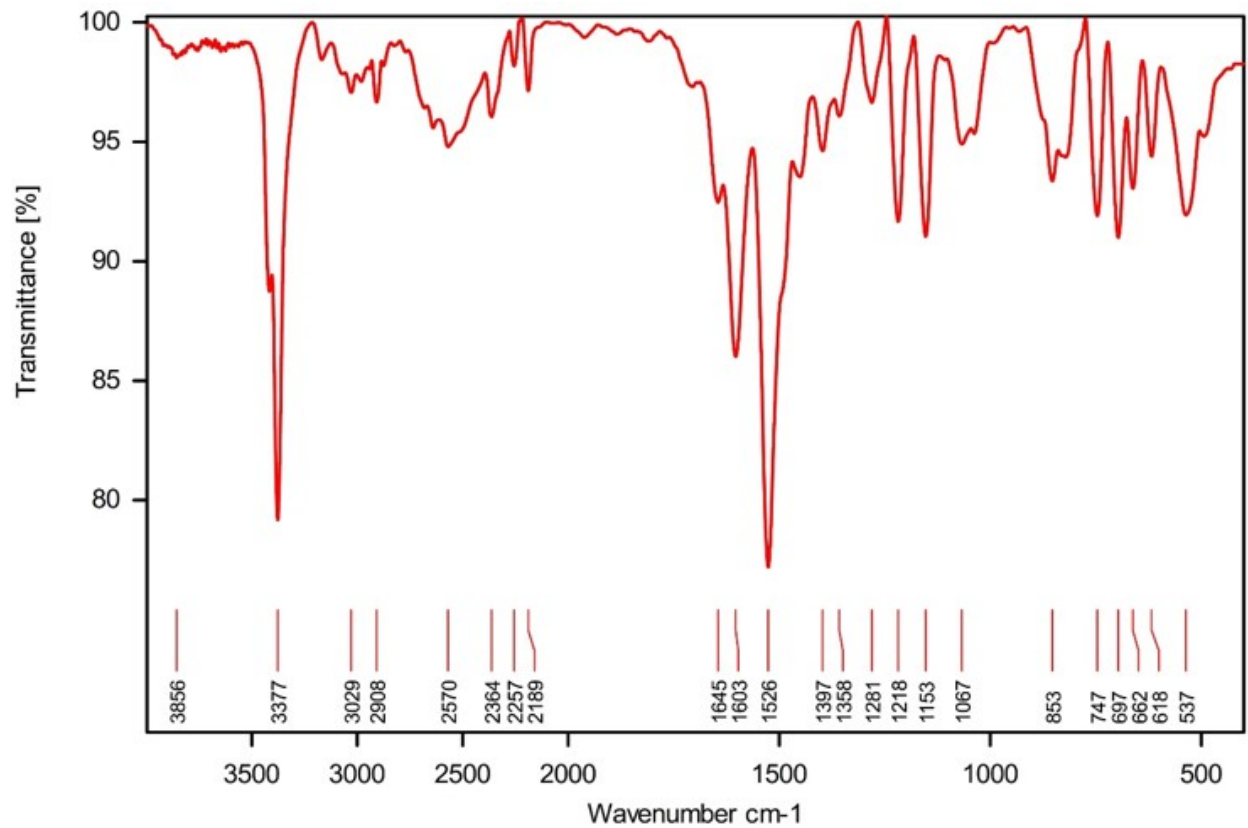

**Figure S24.** FT-IR of 6-amino-3-methyl-4-phenyl-1,4-dihydropyrido[2,3-c]pyrazole-5-carbonitrile in KBr.

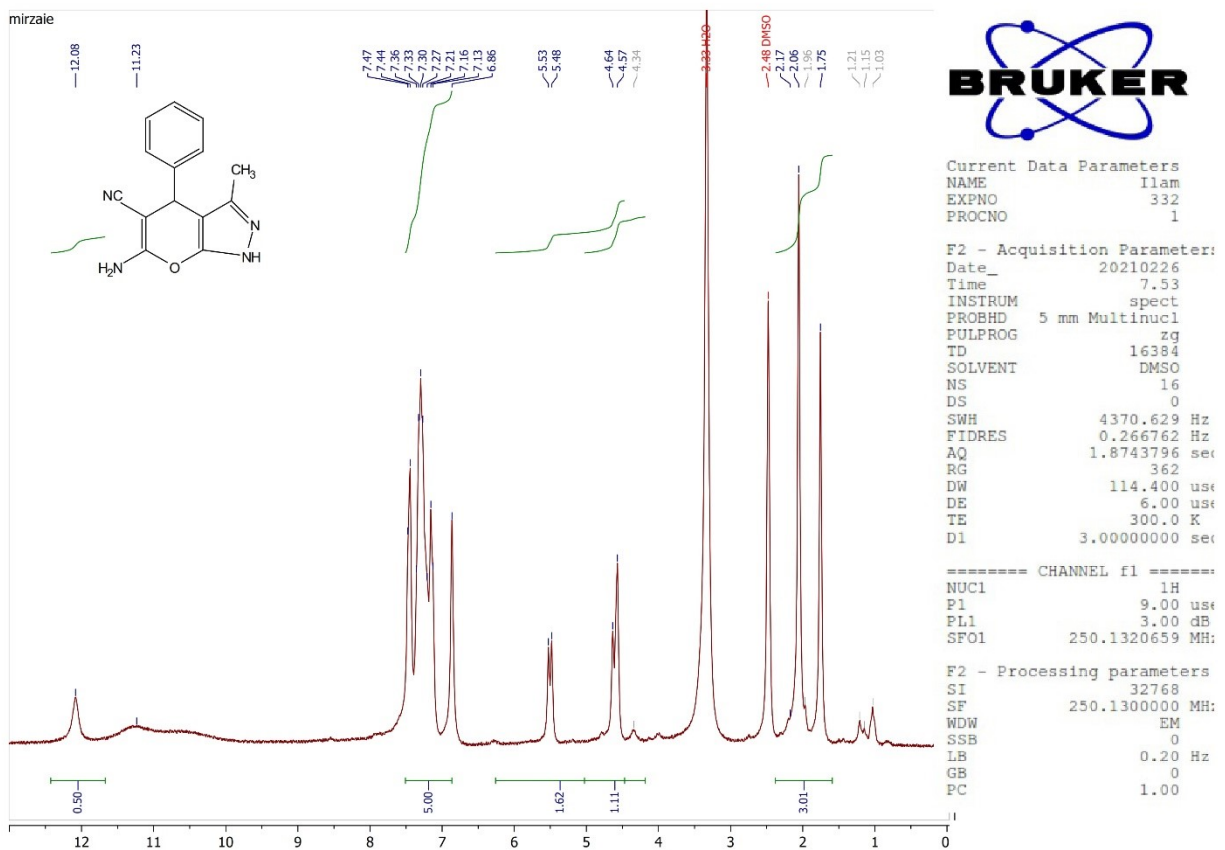

Figure S25. <sup>1</sup>H NMR of 6-amino-3-methyl-4-phenyl-1,4-dihydropyrano[2,3-c]pyrazole-5-carbonitrile in DMSO.

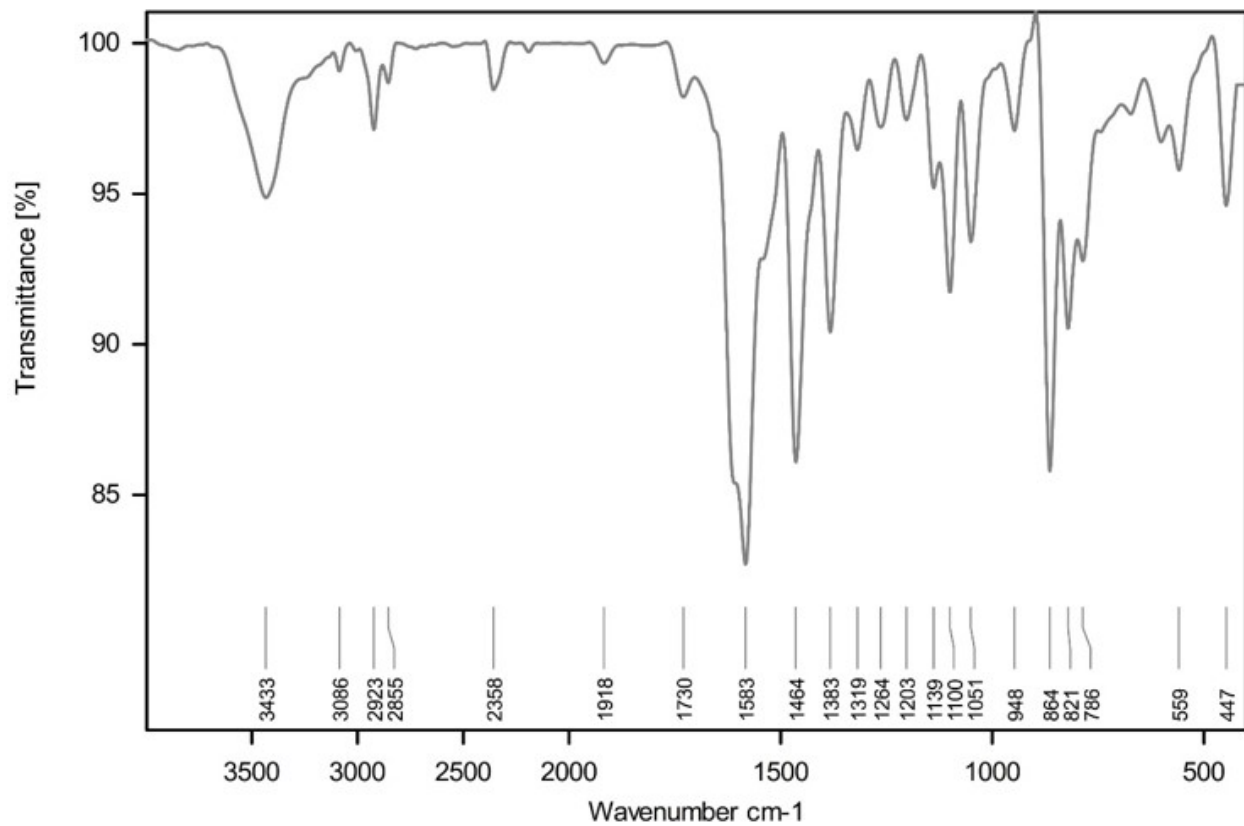

**Figure S26.** FT-IR of 4-(2,4-chlorophenyl)-3,6,8-trimethyl-4,8-dihydropyrazolo[4',3':5,6]pyrano[2,3-d]pyrimidine-5,7(1H,6H)-dione in KBr.

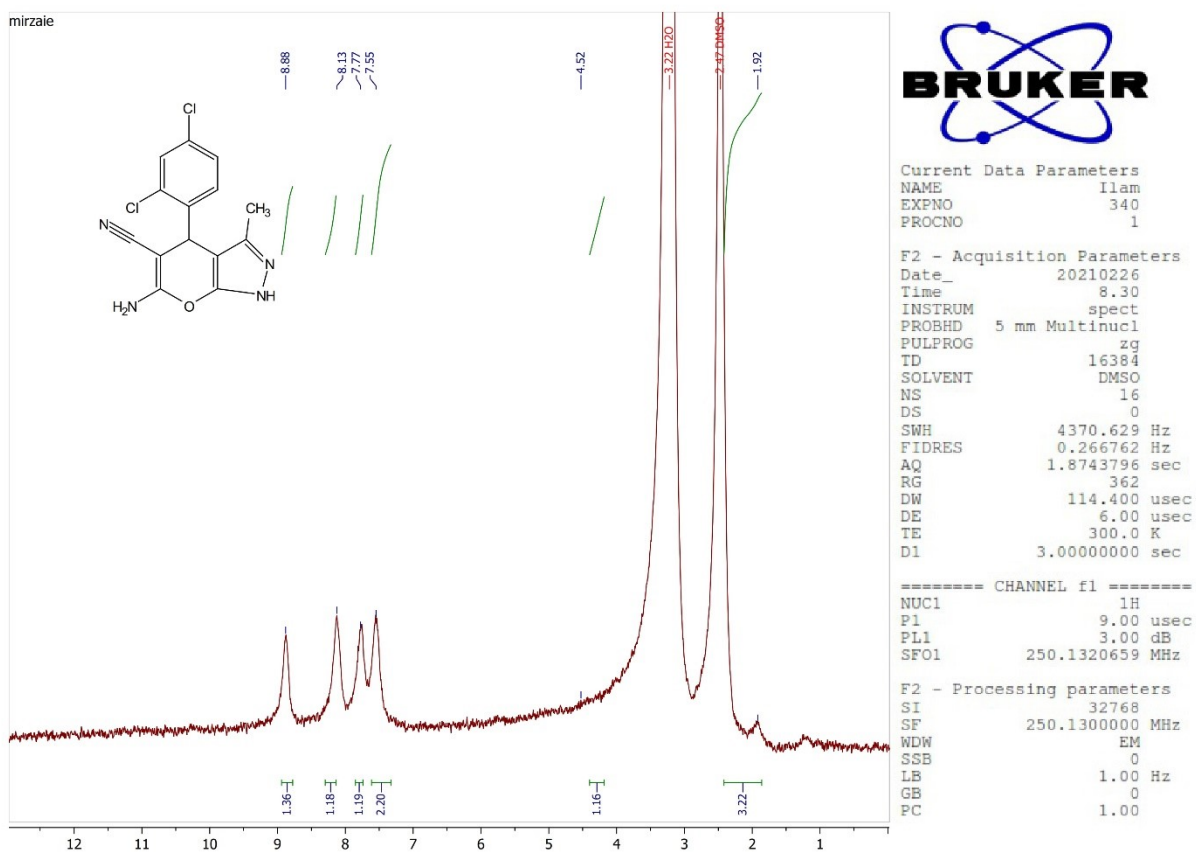

**Figure S27.** <sup>1</sup>H NMR of 4-(2,4-chlorophenyl)-3,6,8-trimethyl-4,8-dihydropyrazolo[4',3':5,6]pyrano[2,3-d]pyrimidine-5,7(1H,6H)-dione in DMSO.



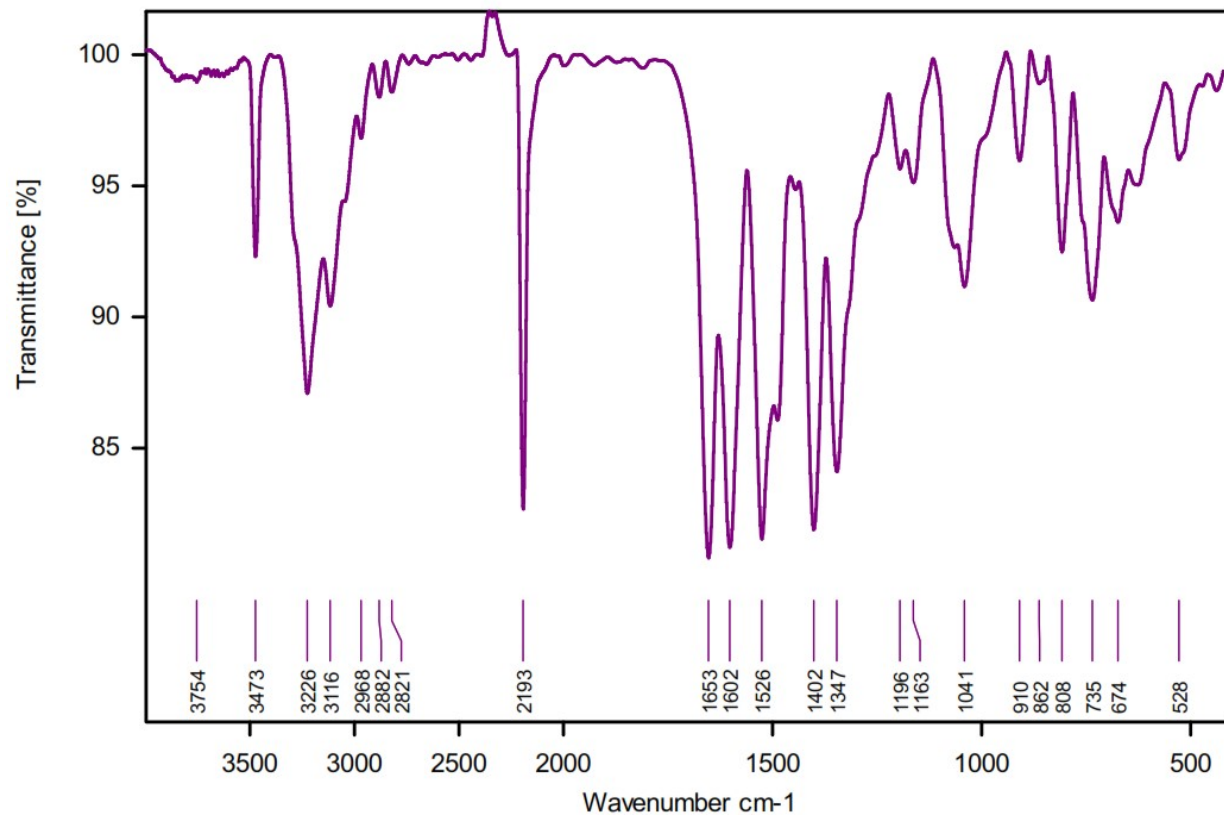

**Figure S28.** FT-IR of 6-amino-3-methyl-4-(3-nitrophenyl)-1,4-dihydropyrano[2,3-c]pyrazole-5-carbonitrile in KBr.

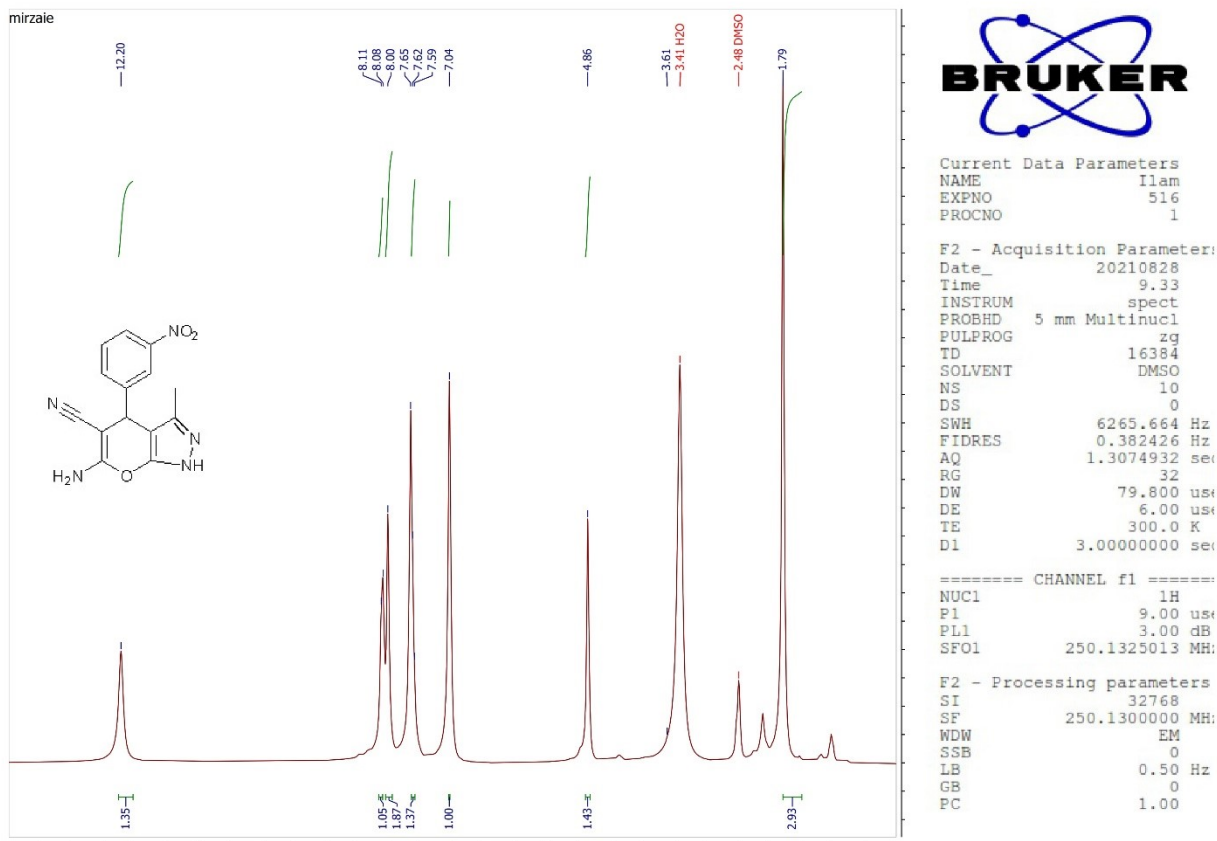

**Figure S29.** <sup>1</sup>H NMR of 6-amino-3-methyl-4-(3-nitrophenyl)-1,4-dihydropyrano[2,3-c]pyrazole-5-carbonitrile in DMSO.

Mirzaei-AM4-1402-6-4

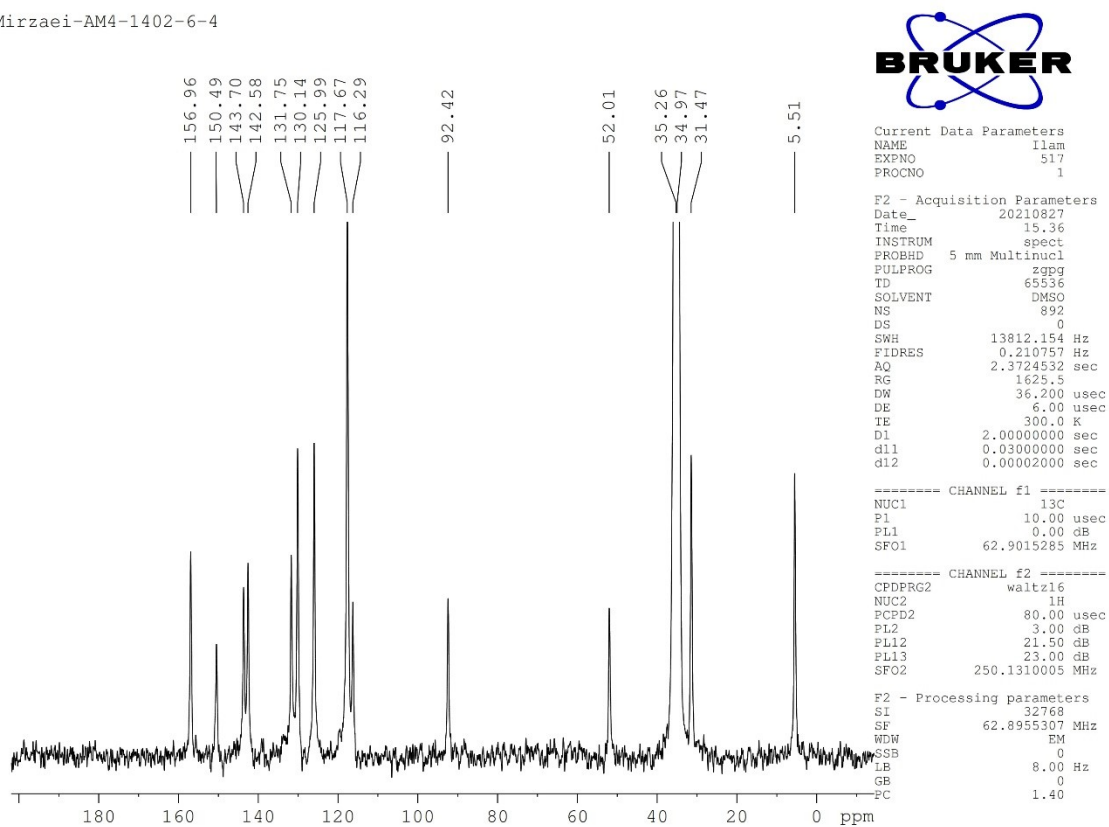

**Figure S30.**  $^{13}\text{C}$  NMR of 6-amino-3-methyl-4-(3-nitrophenyl)-1,4-dihydropyrano[2,3-c]pyrazole-5-carbonitrile in DMSO.

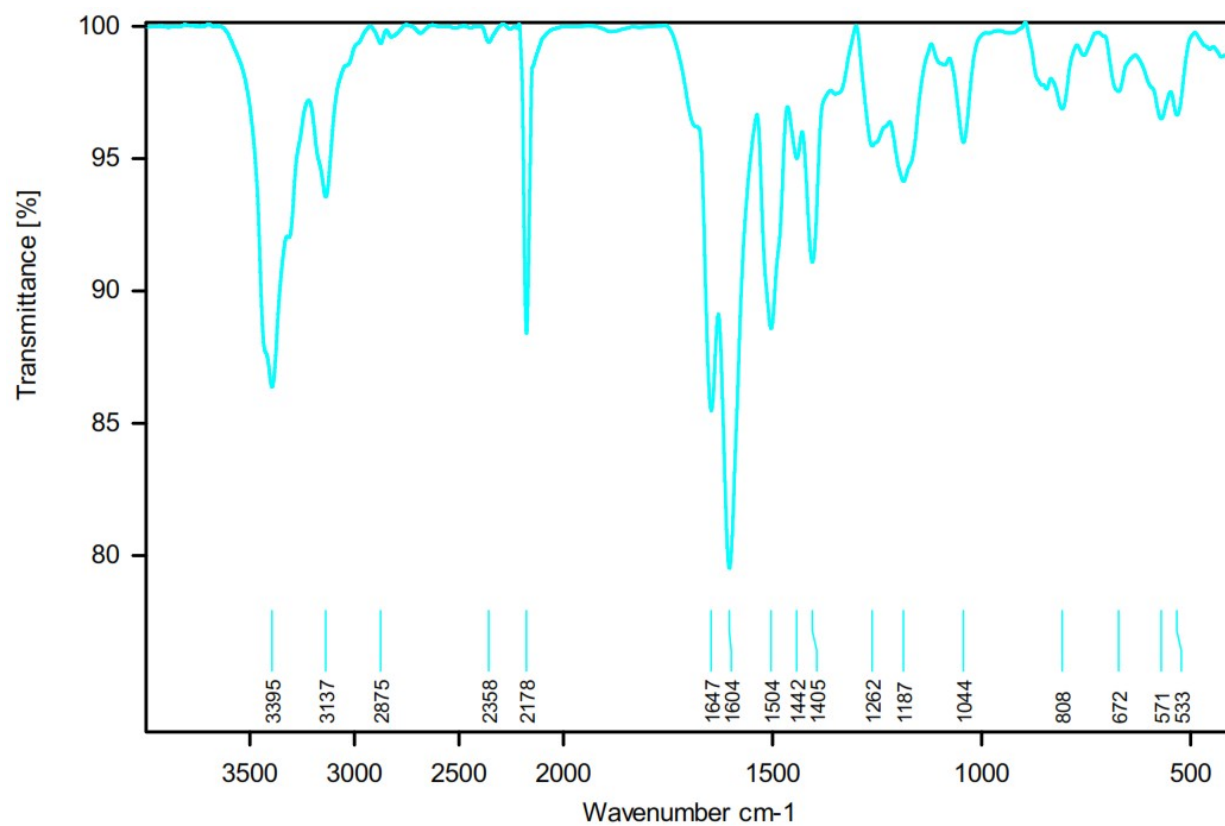

**Figure S31.** FT-IR of 6-amino-4-(4-hydroxyphenyl)-3-methyl-1,4-dihydropyrano[2,3-c]pyrazole-5-carbonitrile in KBr.

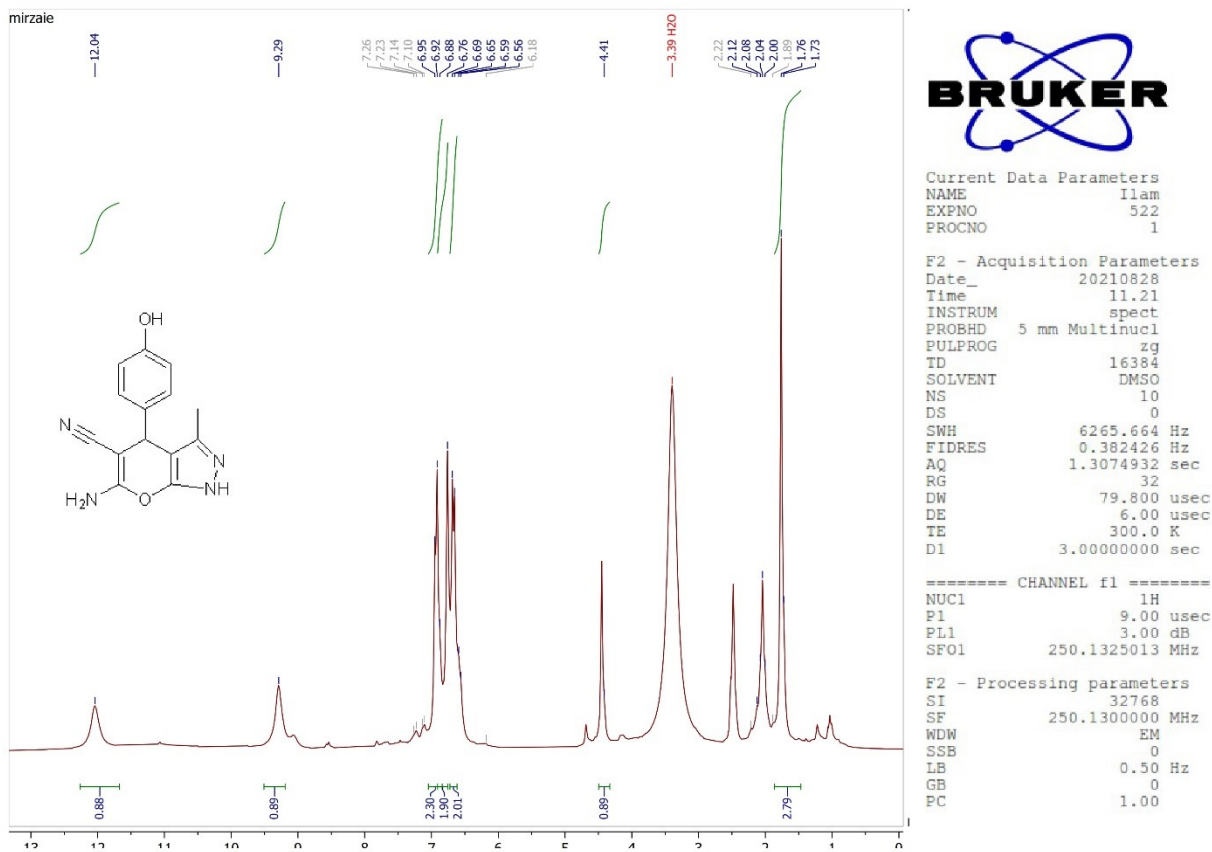

**Figure S32.**  $^1\text{H}$  NMR of 6-amino-4-(4-hydroxyphenyl)-3-methyl-1,4-dihydropyrano[2,3-c]pyrazole-5-carbonitrile in DMSO.

Mirzaei-AM5

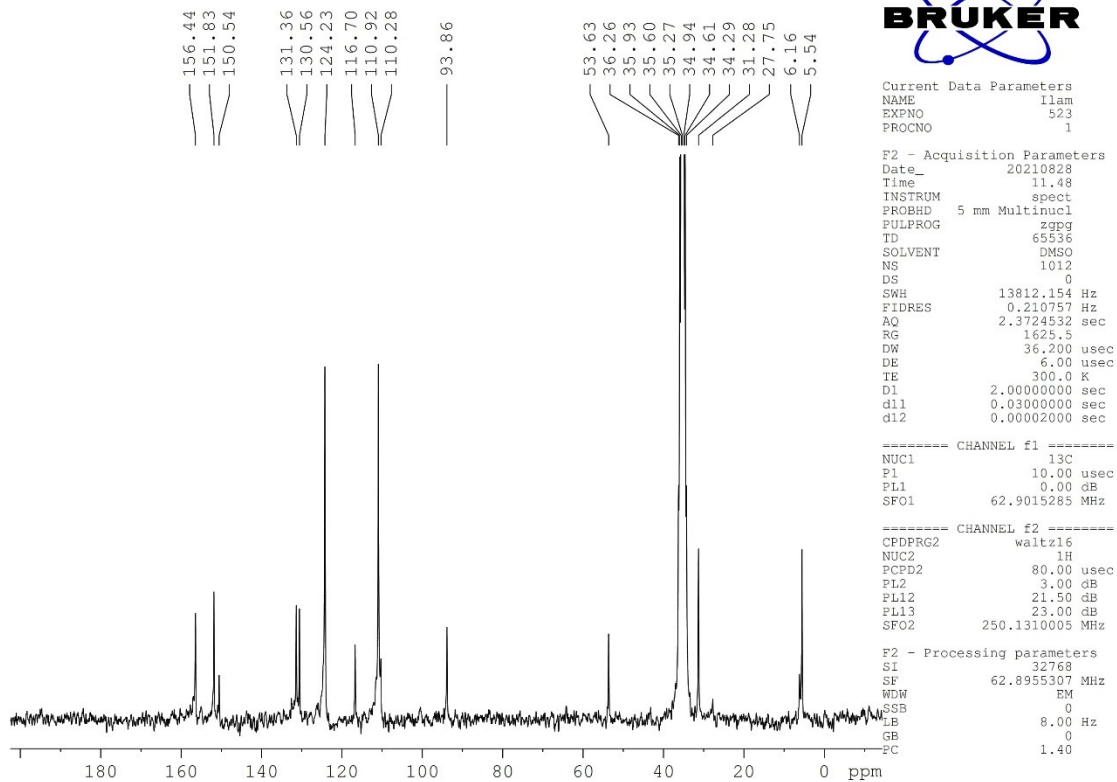

**Figure S33.**  $^{13}\text{C}$  NMR of 6-amino-4-(4-hydroxyphenyl)-3-methyl-1,4-dihydropyranopyrazole-5-carbonitrile in DMSO.
